# Supplementary material for: Three is a crowd in iterated prisoner's dilemmas: experimental evidence on reciprocal behavior
Source: PubMed Central journal article supplement — Sci Rep. 2012 Sep 7;2:638. doi: 10.1038/srep00638 (PMC3435562; doi:10.1038/srep00638), 2012-09-07
Supplement: srep00638-s1.pdf [file srep00638-s1.pdf]

Supporting information:  
*Reciprocity in multi-player prisoner's dilemma  
experiments leads to cooperation only in groups of  
two players*

Jelena Grujić, Burcu Eke, Antonio Cabrales, José A. Cuesta and  
Angel Sánchez

May 15, 2012

## 1 English translation of the instructions

We include below an English translation of the instructions as they were read and distributed to the participants in the experiment. We present the version for the case in which there was computer intervention to increase highly cooperative contexts. The instructions for the sessions without random computer intervention are identical, except that the paragraph after **Random intervention** does not exist. The version provided is for the case of groups of five players. The instructions for the sessions with smaller number of players are identical except that the complete payoff tables are different and the exchange rate also varies as indicated in the main text.

### Instructions

Thanks for participating in this experiment, which is part of a research project in economics in which we try to understand how decisions are made, but where a particular behavior is expected of you.

From this moment the experiment begins. Please be quiet for its whole duration. turn off your cell phone, and remember that no material alien to the experiment is allowed (including pens, pencils and paper).

Your earnings depend on your decisions and the decisions of other participants. In addition you receive as a payment 10 euros just for participating.

From now and until the end of the experiment you are not allowed to communicate with other participants. If you have any questions, please raise your hand and an instructor will answer your questions in private.

**Please do not ask questions out loud!**

### **The experiment**

The experiment consists of an undetermined number turns or rounds, and it will last around an hour and never more than two. The rules are the same for all participants and on every round. Throughout the experiment you will be part of the same group of 5 participants (5 including yourself). None of you will know who are the other 4 participants with whom you play, and in particular, they need not be the people close to you.

### **Rounds**

In every round you will see two buttons on the screen, corresponding to the actions A and B, of which you must choose one by clicking the mouse on it. You have 10 seconds to do so, and you necessarily have choose one of two options (the experiment will be stopped if a participant does not press one of them). When all the players have chosen, you will see the information on the number of players who have chosen A, the number of those who have chosen B and your earnings on that round.

The earnings on each round are computed as follows:

- If you choose A: you receive 7 ECU for each player that chooses A A (excluding yourself) and nothing for each player choosing B.
- If you choose B: you receive 10 ECU for each player choosing B and nothing for each player choosing B.

The following table shows all the possibilities for your personal earnings:

|              | The others choose: |      |      |      |      |
|--------------|--------------------|------|------|------|------|
|              | AAAA               | AAAB | AABB | ABBB | BBBB |
| You choose A | 28                 | 21   | 14   | 7    | 0    |
| You choose B | 40                 | 30   | 20   | 10   | 0    |

while the earnings for the group as a whole are:

| Decisions   | AAAAA | AAAAB | AAABB | AABBB | ABBBB | BBBBB |
|-------------|-------|-------|-------|-------|-------|-------|
| Group earn. | 140   | 124   | 102   | 74    | 40    | 0     |

The screen with the information on what the other players have done and your earnings will show itself for 20 seconds. You must press "OK" to go to the following round; the screen for the next round will be shown when all players press "OK".

### **Random intervention**

Occasionally, and in completely random way, the computer can change your decision or that of the other player. The program does not report this change when it occurs. In such cases the payment is calculated as if the player concerned had actually taken the decision that the computer chose. The frequency with which this happens is low: your actions will remain unchanged for at least an 85% of the time.

### **Payments**

After the last round, the ECUs you obtained in each round will be added to obtain your total earnings, so you need to pay full attention until the end. The ECUs will be converted to euros so that 100 ECUs will be converted to one Euro. Additionally you will receive 10 Euros just for participating.

### **End of instructions**

## **2 Data on the output of our generalized linear mixed model**

The following pages collect the data produced by our generalized linear mixed model (GLMM) in full, so all the information it provides can be analyzed.

We have used R [1] to sort and format the data files in the way needed for the analysis. The (GLMM) analysis is carried out using SAS software [2]. We have performed the analysis using the GLIMMIX procedure of the SAS software. Various other SAS procedures are also used to sort the data, and to plot necessary preliminary plots of the data.

### **References**

[1] R Development Core Team, *R: A Language and Environment for Statistical Computing* (R Foundation for Statistical Computing, Vienna, Austria, 2011).

[2] Copyright, SAS Institute Inc., Cary, NC, USA.

## The GLIMMIX Procedure

## Model Information

|                            |                   |
|----------------------------|-------------------|
| Data Set                   | WORK.COMBINED2222 |
| Response Variable          | RealAction        |
| Response Distribution      | Binary            |
| Link Function              | Logit             |
| Variance Function          | Default           |
| Variance Matrix Blocked By | actor             |
| Estimation Technique       | Residual PL       |
| Degrees of Freedom Method  | Satterthwaite     |

## Class Level Information

| Class | Levels | Values                                                                                                                                     |
|-------|--------|--------------------------------------------------------------------------------------------------------------------------------------------|
| actor | 228    | A1 A10 A11 A12 A13 A14 A15 A16 A17 A18 A19 A2<br>A20 A3 A4 A5 A6 A7 A8 A9 B1 B10 B11 B12 B13<br>B14 B15 B16 B17 B18 B19 B2 B20 B21 B22 B23 |

B24 B25 B26 B27 B28 B29 B3 B30 B4 B5 B6 B7 B8  
B9 C1 C10 C11 C12 C13 C14 C15 C16 C17 C18 C2  
C3 C4 C5 C6 C7 C8 C9 D1 D10 D11 D12 D13 D14  
D15 D16 D17 D18 D19 D2 D20 D21 D22 D23 D24 D3  
D4 D5 D6 D7 D8 D9 E1 E10 E11 E12 E13 E14 E15  
E16 E2 E3 E4 E5 E6 E7 E8 E9 F1 F10 F11 F12  
F13 F14 F15 F16 F17 F18 F19 F2 F20 F3 F4 F5  
F6 F7 F8 F9 G1 G10 G11 G12 G13 G14 G15 G16  
G17 G18 G19 G2 G20 G3 G4 G5 G6 G7 G8 G9 H1  
H10 H11 H12 H13 H14 H15 H16 H17 H18 H19 H2  
H20 H3 H4 H5 H6 H7 H8 H9 I1 I10 I11 I12 I13  
I14 I15 I2 I3 I4 I5 I6 I7 I8 I9 J1 J10 J11  
J12 J13 J14 J15 J2 J3 J4 J5 J6 J7 J8 J9 K1  
K10 K11 K12 K13 K14 K15 K2 K3 K4 K5 K6 K7 K8  
K9 L1 L10 L11 L12 L13 L14 L15 L2 L3 L4 L5 L6  
L7 L8 L9

actor\_g 70 A1 A10 A2 A3 A4 A5 A6 A7 A8 A9 B1 B10 B11 B12  
B13 B14 B15 B2 B3 B4 B5 B6 B7 B8 B9 C1 C2 C3  
C4 C5 C6 D1 D2 D3 D4 D5 D6 D7 D8 E1 E2 E3 E4  
F1 F2 F3 F4 F5 G1 G2 G3 G4 G5 H1 H2 H3 H4 H5  
I1 I2 I3 J1 J2 J3 K1 K2 K3 L1 L2 L3

factor 2 0 1

numb 4 2 3 4 5

numb\_2 2 0 1  
numb\_3 2 0 1  
numb\_4 2 0 1  
gender 2 0 1

Number of Observations Read 22830  
Number of Observations Used 22602

## The GLIMMIX Procedure

## Response Profile

| Ordered |            | Total     |
|---------|------------|-----------|
| Value   | RealAction | Frequency |
| 1       | 0          | 13541     |
| 2       | 1          | 9061      |

The GLIMMIX procedure is modeling the probability that RealAction='1'.

## Dimensions

|                          |     |
|--------------------------|-----|
| G-side Cov. Parameters   | 2   |
| R-side Cov. Parameters   | 2   |
| Columns in X             | 9   |
| Columns in Z per Subject | 5   |
| Subjects (Blocks in V)   | 228 |
| Max Obs per Subject      | 100 |

### Optimization Information

Optimization Technique    Newton-Raphson with Ridging  
Parameters in Optimization    3  
Lower Boundaries            3  
Upper Boundaries            1  
Fixed Effects                Profiled  
Residual Variance            Profiled  
Starting From                Data

### Iteration History

| Iteration | Restarts | Subiterations | Objective<br>Function | Max<br>Change | Gradient |
|-----------|----------|---------------|-----------------------|---------------|----------|
| 0         | 0        | 5             | 106722.31933          | 0.60965392    | 4.668E-6 |
| 1         | 0        | 4             | 110041.60055          | 0.57420436    | 3.29E-7  |
| 2         | 0        | 3             | 110832.77207          | 0.31528469    | 3.69E-6  |
| 3         | 0        | 2             | 110858.0943           | 0.10284098    | 0.000139 |
| 4         | 0        | 2             | 110815.39206          | 0.02329775    | 2.982E-7 |



|    |   |   |              |            |          |
|----|---|---|--------------|------------|----------|
| 5  | 0 | 1 | 110801.82428 | 0.00472044 | 0.00078  |
| 6  | 0 | 1 | 110799.05308 | 0.00095238 | 0.000032 |
| 7  | 0 | 1 | 110798.48945 | 0.00019032 | 1.258E-6 |
| 8  | 0 | 1 | 110798.37725 | 0.00003811 | 5.048E-8 |
| 9  | 0 | 1 | 110798.35472 | 0.00000761 | 2.001E-9 |
| 10 | 0 | 1 | 110798.35023 | 0.00000152 | 6.661E-9 |
| 11 | 0 | 1 | 110798.34933 | 0.00000030 | 3.208E-7 |
| 12 | 0 | 1 | 110798.34915 | 0.00000006 | 1.369E-9 |

8290

The GLIMMIX Procedure

Iteration History

| Iteration | Restarts | Subiterations | Objective<br>Function | Max<br>Change | Gradient |
|-----------|----------|---------------|-----------------------|---------------|----------|
| 13        | 0        | 0             | 110798.34912          | 0.00000000    | 2.868E-6 |

Convergence criterion (PCONV=1.11022E-8) satisfied.

Fit Statistics

|                              |          |
|------------------------------|----------|
| -2 Res Log Pseudo-Likelihood | 110798.3 |
| Generalized Chi-Square       | 20480.90 |
| Gener. Chi-Square / DF       | 0.91     |

Estimated G Matrix for RANDOM Statement 1.

| Effect    | Subject        | Row   | Col1     |
|-----------|----------------|-------|----------|
| Intercept | actor(actor_g) | A1 A8 | 1 0.8582 |

Estimated G Matrix for RANDOM Statement 2.

| Effect         | Subject | numb | Row | Col1 | Col2   | Col3   | Col4   |
|----------------|---------|------|-----|------|--------|--------|--------|
| NcoopUlag*numb | actor   | A1   | 2   | 1    | 0.3345 |        |        |
| NcoopUlag*numb | actor   | A1   | 3   | 2    |        | 0.3345 |        |
| NcoopUlag*numb | actor   | A1   | 4   | 3    |        |        | 0.3345 |
| NcoopUlag*numb | actor   | A1   | 5   | 4    |        |        |        |

Covariance Parameter Estimates

| Cov Parm       | Subject        | Standard |         |
|----------------|----------------|----------|---------|
|                |                | Estimate | Error   |
| Intercept      | actor(actor_g) | 0.8582   | 0.1121  |
| NcoopUlag*numb | actor          | 0.3345   | 0.04444 |
| AR(1)          | actor          | -0.03680 | 0.01767 |

Residual

0.9065 0.008702

## The GLIMMIX Procedure

## Solutions for Fixed Effects

| Effect         | numb | Standard |         | DF    | t Value | Pr >  t |
|----------------|------|----------|---------|-------|---------|---------|
|                |      | Estimate | Error   |       |         |         |
| numb           | 2    | -1.5379  | 0.1557  | 214.4 | -9.88   | <.0001  |
| numb           | 3    | -1.7299  | 0.1589  | 174.7 | -10.89  | <.0001  |
| numb           | 4    | -1.8421  | 0.1192  | 178.8 | -15.45  | <.0001  |
| numb           | 5    | -1.6513  | 0.1356  | 184.4 | -12.18  | <.0001  |
| NcoopUlag*numb | 2    | 1.6719   | 0.1048  | 282.5 | 15.96   | <.0001  |
| NcoopUlag*numb | 3    | 0.5150   | 0.1043  | 200.4 | 4.94    | <.0001  |
| NcoopUlag*numb | 4    | 0.3790   | 0.07529 | 178.3 | 5.03    | <.0001  |
| NcoopUlag*numb | 5    | 0.2363   | 0.08242 | 159.5 | 2.87    | 0.0047  |
| Lagy           |      | 0.6768   | 0.04106 | 18074 | 16.48   | <.0001  |

## Type III Tests of Fixed Effects

| Num | Den |
|-----|-----|
|-----|-----|

| Effect         | DF | DF    | F Value | Pr > F |
|----------------|----|-------|---------|--------|
| numb           | 4  | 186.9 | 150.82  | <.0001 |
| NcoopUlag*numb | 4  | 196   | 75.37   | <.0001 |
| Lagy           | 1  | 18074 | 271.68  | <.0001 |

### Solution for Random Effects

| Effect         | numb | Subject               | Std Err  |        | DF    | t Value | Pr >  t |
|----------------|------|-----------------------|----------|--------|-------|---------|---------|
|                |      |                       | Estimate | Pred   |       |         |         |
| Intercept      |      | actor(actor_g) A1 A8  | -0.2487  | 0.4243 | 837.2 | -0.59   | 0.5580  |
| NcoopUlag*numb | 2    | actor A1              | 0.1629   | 0.3286 | 701.6 | 0.50    | 0.6203  |
| NcoopUlag*numb | 3    | actor A1              | 0        | 0.5783 | 113.3 | 0.00    | 1.0000  |
| NcoopUlag*numb | 4    | actor A1              | 0        | 0.5783 | 113.3 | 0.00    | 1.0000  |
| NcoopUlag*numb | 5    | actor A1              | 0        | 0.5783 | 113.3 | 0.00    | 1.0000  |
| Intercept      |      | actor(actor_g) A10 A8 | 0.3552   | 0.4013 | 977.8 | 0.89    | 0.3763  |
| NcoopUlag*numb | 2    | actor A10             | -0.1057  | 0.3141 | 822.2 | -0.34   | 0.7365  |
| NcoopUlag*numb | 3    | actor A10             | 0        | 0.5783 | 113.3 | 0.00    | 1.0000  |
| NcoopUlag*numb | 4    | actor A10             | 0        | 0.5783 | 113.3 | 0.00    | 1.0000  |
| NcoopUlag*numb | 5    | actor A10             | 0        | 0.5783 | 113.3 | 0.00    | 1.0000  |
| Intercept      |      | actor(actor_g) A11 A3 | 0.1677   | 0.3724 | 1059  | 0.45    | 0.6526  |

|                  |                       |         |        |       |       |        |
|------------------|-----------------------|---------|--------|-------|-------|--------|
| NcoopUlag*numb 2 | actor A11             | -0.5183 | 0.2700 | 1054  | -1.92 | 0.0551 |
| NcoopUlag*numb 3 | actor A11             | 0       | 0.5783 | 113.3 | 0.00  | 1.0000 |
| NcoopUlag*numb 4 | actor A11             | 0       | 0.5783 | 113.3 | 0.00  | 1.0000 |
| NcoopUlag*numb 5 | actor A11             | 0       | 0.5783 | 113.3 | 0.00  | 1.0000 |
| Intercept        | actor(actor_g) A12 A5 | 1.3662  | 0.5575 | 480.9 | 2.45  | 0.0146 |
| NcoopUlag*numb 2 | actor A12             | -0.2691 | 0.3860 | 406.4 | -0.70 | 0.4862 |
| NcoopUlag*numb 3 | actor A12             | 0       | 0.5783 | 113.3 | 0.00  | 1.0000 |
| NcoopUlag*numb 4 | actor A12             | 0       | 0.5783 | 113.3 | 0.00  | 1.0000 |
| NcoopUlag*numb 5 | actor A12             | 0       | 0.5783 | 113.3 | 0.00  | 1.0000 |

## The GLIMMIX Procedure

## Solution for Random Effects

| Effect         | numb | Subject               | Std Err  |        | DF    | t Value | Pr >  t |
|----------------|------|-----------------------|----------|--------|-------|---------|---------|
|                |      |                       | Estimate | Pred   |       |         |         |
| Intercept      |      | actor(actor_g) A13 A6 | 0.4640   | 0.3826 | 934.4 | 1.21    | 0.2255  |
| NcoopUlag*numb | 2    | actor A13             | -1.0753  | 0.3274 | 794.7 | -3.28   | 0.0011  |
| NcoopUlag*numb | 3    | actor A13             | 0        | 0.5783 | 113.3 | 0.00    | 1.0000  |
| NcoopUlag*numb | 4    | actor A13             | 0        | 0.5783 | 113.3 | 0.00    | 1.0000  |
| NcoopUlag*numb | 5    | actor A13             | 0        | 0.5783 | 113.3 | 0.00    | 1.0000  |
| Intercept      |      | actor(actor_g) A14 A9 | -0.9169  | 0.4341 | 822.1 | -2.11   | 0.0350  |
| NcoopUlag*numb | 2    | actor A14             | 0.5475   | 0.3292 | 676.6 | 1.66    | 0.0968  |
| NcoopUlag*numb | 3    | actor A14             | 0        | 0.5783 | 113.3 | 0.00    | 1.0000  |
| NcoopUlag*numb | 4    | actor A14             | 0        | 0.5783 | 113.3 | 0.00    | 1.0000  |
| NcoopUlag*numb | 5    | actor A14             | 0        | 0.5783 | 113.3 | 0.00    | 1.0000  |
| Intercept      |      | actor(actor_g) A15 A7 | 0.4551   | 0.3483 | 1232  | 1.31    | 0.1916  |
| NcoopUlag*numb | 2    | actor A15             | -0.9813  | 0.2856 | 1201  | -3.44   | 0.0006  |
| NcoopUlag*numb | 3    | actor A15             | 0        | 0.5783 | 113.3 | 0.00    | 1.0000  |
| NcoopUlag*numb | 4    | actor A15             | 0        | 0.5783 | 113.3 | 0.00    | 1.0000  |



|                  |                       |          |        |       |       |        |
|------------------|-----------------------|----------|--------|-------|-------|--------|
| NcoopUlag*numb 5 | actor A15             | 0        | 0.5783 | 113.3 | 0.00  | 1.0000 |
| Intercept        | actor(actor_g) A16 A2 | 0.007632 | 0.3977 | 1007  | 0.02  | 0.9847 |
| NcoopUlag*numb 2 | actor A16             | -0.1901  | 0.2893 | 947.9 | -0.66 | 0.5112 |
| NcoopUlag*numb 3 | actor A16             | 0        | 0.5783 | 113.3 | 0.00  | 1.0000 |
| NcoopUlag*numb 4 | actor A16             | 0        | 0.5783 | 113.3 | 0.00  | 1.0000 |
| NcoopUlag*numb 5 | actor A16             | 0        | 0.5783 | 113.3 | 0.00  | 1.0000 |
| Intercept        | actor(actor_g) A17 A5 | -1.1782  | 0.5059 | 570.4 | -2.33 | 0.0202 |
| NcoopUlag*numb 2 | actor A17             | 0.7254   | 0.3598 | 494.2 | 2.02  | 0.0443 |
| NcoopUlag*numb 3 | actor A17             | 0        | 0.5783 | 113.3 | 0.00  | 1.0000 |
| NcoopUlag*numb 4 | actor A17             | 0        | 0.5783 | 113.3 | 0.00  | 1.0000 |
| NcoopUlag*numb 5 | actor A17             | 0        | 0.5783 | 113.3 | 0.00  | 1.0000 |
| Intercept        | actor(actor_g) A18 A4 | 0.7475   | 0.5141 | 648.2 | 1.45  | 0.1464 |
| NcoopUlag*numb 2 | actor A18             | -0.3276  | 0.3343 | 610.5 | -0.98 | 0.3276 |
| NcoopUlag*numb 3 | actor A18             | 0        | 0.5783 | 113.3 | 0.00  | 1.0000 |
| NcoopUlag*numb 4 | actor A18             | 0        | 0.5783 | 113.3 | 0.00  | 1.0000 |
| NcoopUlag*numb 5 | actor A18             | 0        | 0.5783 | 113.3 | 0.00  | 1.0000 |
| Intercept        | actor(actor_g) A19 A2 | 0.2940   | 0.3889 | 1056  | 0.76  | 0.4498 |
| NcoopUlag*numb 2 | actor A19             | -0.1605  | 0.2962 | 947.1 | -0.54 | 0.5881 |
| NcoopUlag*numb 3 | actor A19             | 0        | 0.5783 | 113.3 | 0.00  | 1.0000 |
| NcoopUlag*numb 4 | actor A19             | 0        | 0.5783 | 113.3 | 0.00  | 1.0000 |
| NcoopUlag*numb 5 | actor A19             | 0        | 0.5783 | 113.3 | 0.00  | 1.0000 |
| Intercept        | actor(actor_g) A2 A10 | -0.03799 | 0.3403 | 1019  | -0.11 | 0.9111 |
| NcoopUlag*numb 2 | actor A2              | -1.1766  | 0.3015 | 943.7 | -3.90 | 0.0001 |

|                |   |                       |         |        |       |       |        |
|----------------|---|-----------------------|---------|--------|-------|-------|--------|
| NcoopUlag*numb | 3 | actor A2              | 0       | 0.5783 | 113.3 | 0.00  | 1.0000 |
| NcoopUlag*numb | 4 | actor A2              | 0       | 0.5783 | 113.3 | 0.00  | 1.0000 |
| NcoopUlag*numb | 5 | actor A2              | 0       | 0.5783 | 113.3 | 0.00  | 1.0000 |
| Intercept      |   | actor(actor_g) A20 A7 | 1.3108  | 0.3281 | 1318  | 3.99  | <.0001 |
| NcoopUlag*numb | 2 | actor A20             | -1.9860 | 0.2607 | 1448  | -7.62 | <.0001 |
| NcoopUlag*numb | 3 | actor A20             | 0       | 0.5783 | 113.3 | 0.00  | 1.0000 |
| NcoopUlag*numb | 4 | actor A20             | 0       | 0.5783 | 113.3 | 0.00  | 1.0000 |
| NcoopUlag*numb | 5 | actor A20             | 0       | 0.5783 | 113.3 | 0.00  | 1.0000 |
| Intercept      |   | actor(actor_g) A3 A10 | -0.9273 | 0.3953 | 754.1 | -2.35 | 0.0192 |

## The GLIMMIX Procedure

## Solution for Random Effects

| Effect         | numb | Subject              | Std Err  |        |       |         |         |
|----------------|------|----------------------|----------|--------|-------|---------|---------|
|                |      |                      | Estimate | Pred   | DF    | t Value | Pr >  t |
| NcoopUlag*numb | 2    | actor A3             | 0.4245   | 0.3696 | 540.3 | 1.15    | 0.2513  |
| NcoopUlag*numb | 3    | actor A3             | 0        | 0.5783 | 113.3 | 0.00    | 1.0000  |
| NcoopUlag*numb | 4    | actor A3             | 0        | 0.5783 | 113.3 | 0.00    | 1.0000  |
| NcoopUlag*numb | 5    | actor A3             | 0        | 0.5783 | 113.3 | 0.00    | 1.0000  |
| Intercept      |      | actor(actor_g) A4 A9 | -0.05599 | 0.3841 | 987.1 | -0.15   | 0.8841  |
| NcoopUlag*numb | 2    | actor A4             | 0.04414  | 0.2979 | 861.9 | 0.15    | 0.8822  |
| NcoopUlag*numb | 3    | actor A4             | 0        | 0.5783 | 113.3 | 0.00    | 1.0000  |
| NcoopUlag*numb | 4    | actor A4             | 0        | 0.5783 | 113.3 | 0.00    | 1.0000  |
| NcoopUlag*numb | 5    | actor A4             | 0        | 0.5783 | 113.3 | 0.00    | 1.0000  |
| Intercept      |      | actor(actor_g) A5 A3 | -0.9378  | 0.4370 | 785.9 | -2.15   | 0.0322  |
| NcoopUlag*numb | 2    | actor A5             | 0.6114   | 0.3432 | 627.5 | 1.78    | 0.0753  |
| NcoopUlag*numb | 3    | actor A5             | 0        | 0.5783 | 113.3 | 0.00    | 1.0000  |
| NcoopUlag*numb | 4    | actor A5             | 0        | 0.5783 | 113.3 | 0.00    | 1.0000  |
| NcoopUlag*numb | 5    | actor A5             | 0        | 0.5783 | 113.3 | 0.00    | 1.0000  |

|                  |                       |          |        |       |       |        |
|------------------|-----------------------|----------|--------|-------|-------|--------|
| Intercept        | actor(actor_g) A6 A1  | 0.7345   | 0.5735 | 445.5 | 1.28  | 0.2010 |
| NcoopUlag*numb 2 | actor A6              | 0.4614   | 0.4258 | 313.7 | 1.08  | 0.2794 |
| NcoopUlag*numb 3 | actor A6              | 0        | 0.5783 | 113.3 | 0.00  | 1.0000 |
| NcoopUlag*numb 4 | actor A6              | 0        | 0.5783 | 113.3 | 0.00  | 1.0000 |
| NcoopUlag*numb 5 | actor A6              | 0        | 0.5783 | 113.3 | 0.00  | 1.0000 |
| Intercept        | actor(actor_g) A7 A1  | 0.04167  | 0.4968 | 668.1 | 0.08  | 0.9332 |
| NcoopUlag*numb 2 | actor A7              | -0.08266 | 0.3321 | 620.2 | -0.25 | 0.8035 |
| NcoopUlag*numb 3 | actor A7              | 0        | 0.5783 | 113.3 | 0.00  | 1.0000 |
| NcoopUlag*numb 4 | actor A7              | 0        | 0.5783 | 113.3 | 0.00  | 1.0000 |
| NcoopUlag*numb 5 | actor A7              | 0        | 0.5783 | 113.3 | 0.00  | 1.0000 |
| Intercept        | actor(actor_g) A8 A6  | 0.1805   | 0.3967 | 809.4 | 0.45  | 0.6493 |
| NcoopUlag*numb 2 | actor A8              | -0.5872  | 0.3493 | 646.7 | -1.68 | 0.0933 |
| NcoopUlag*numb 3 | actor A8              | 0        | 0.5783 | 113.3 | 0.00  | 1.0000 |
| NcoopUlag*numb 4 | actor A8              | 0        | 0.5783 | 113.3 | 0.00  | 1.0000 |
| NcoopUlag*numb 5 | actor A8              | 0        | 0.5783 | 113.3 | 0.00  | 1.0000 |
| Intercept        | actor(actor_g) A9 A4  | 0.7168   | 0.5496 | 520.7 | 1.30  | 0.1928 |
| NcoopUlag*numb 2 | actor A9              | 0.1862   | 0.3882 | 416.1 | 0.48  | 0.6317 |
| NcoopUlag*numb 3 | actor A9              | 0        | 0.5783 | 113.3 | 0.00  | 1.0000 |
| NcoopUlag*numb 4 | actor A9              | 0        | 0.5783 | 113.3 | 0.00  | 1.0000 |
| NcoopUlag*numb 5 | actor A9              | 0        | 0.5783 | 113.3 | 0.00  | 1.0000 |
| Intercept        | actor(actor_g) B1 B12 | 0.05735  | 0.5112 | 685.4 | 0.11  | 0.9107 |
| NcoopUlag*numb 2 | actor B1              | 0.1992   | 0.3241 | 665.1 | 0.61  | 0.5390 |
| NcoopUlag*numb 3 | actor B1              | 0        | 0.5783 | 113.3 | 0.00  | 1.0000 |

|                  |                        |         |        |       |       |        |
|------------------|------------------------|---------|--------|-------|-------|--------|
| NcoopUlag*numb 4 | actor B1               | 0       | 0.5783 | 113.3 | 0.00  | 1.0000 |
| NcoopUlag*numb 5 | actor B1               | 0       | 0.5783 | 113.3 | 0.00  | 1.0000 |
| Intercept        | actor(actor_g) B10 B1  | -0.2156 | 0.4723 | 765   | -0.46 | 0.6481 |
| NcoopUlag*numb 2 | actor B10              | 0.2624  | 0.3128 | 725.7 | 0.84  | 0.4018 |
| NcoopUlag*numb 3 | actor B10              | 0       | 0.5783 | 113.3 | 0.00  | 1.0000 |
| NcoopUlag*numb 4 | actor B10              | 0       | 0.5783 | 113.3 | 0.00  | 1.0000 |
| NcoopUlag*numb 5 | actor B10              | 0       | 0.5783 | 113.3 | 0.00  | 1.0000 |
| Intercept        | actor(actor_g) B11 B11 | -2.1695 | 0.4876 | 682.1 | -4.45 | <.0001 |
| NcoopUlag*numb 2 | actor B11              | 0.7359  | 0.3361 | 605.6 | 2.19  | 0.0289 |

## The GLIMMIX Procedure

## Solution for Random Effects

| Effect         | numb | Subject                | Std Err  |        | DF    | t Value | Pr >  t |
|----------------|------|------------------------|----------|--------|-------|---------|---------|
|                |      |                        | Estimate | Pred   |       |         |         |
| NcoopUlag*numb | 3    | actor B11              | 0        | 0.5783 | 113.3 | 0.00    | 1.0000  |
| NcoopUlag*numb | 4    | actor B11              | 0        | 0.5783 | 113.3 | 0.00    | 1.0000  |
| NcoopUlag*numb | 5    | actor B11              | 0        | 0.5783 | 113.3 | 0.00    | 1.0000  |
| Intercept      |      | actor(actor_g) B12 B1  | -0.02079 | 0.4665 | 799.6 | -0.04   | 0.9645  |
| NcoopUlag*numb | 2    | actor B12              | 0.4525   | 0.3351 | 664.1 | 1.35    | 0.1774  |
| NcoopUlag*numb | 3    | actor B12              | 0        | 0.5783 | 113.3 | 0.00    | 1.0000  |
| NcoopUlag*numb | 4    | actor B12              | 0        | 0.5783 | 113.3 | 0.00    | 1.0000  |
| NcoopUlag*numb | 5    | actor B12              | 0        | 0.5783 | 113.3 | 0.00    | 1.0000  |
| Intercept      |      | actor(actor_g) B13 B14 | 0.7319   | 0.7465 | 233.3 | 0.98    | 0.3279  |
| NcoopUlag*numb | 2    | actor B13              | 0.4921   | 0.4200 | 292.5 | 1.17    | 0.2423  |
| NcoopUlag*numb | 3    | actor B13              | 0        | 0.5783 | 113.3 | 0.00    | 1.0000  |
| NcoopUlag*numb | 4    | actor B13              | 0        | 0.5783 | 113.3 | 0.00    | 1.0000  |
| NcoopUlag*numb | 5    | actor B13              | 0        | 0.5783 | 113.3 | 0.00    | 1.0000  |
| Intercept      |      | actor(actor_g) B14 B10 | -0.8929  | 0.4759 | 748.5 | -1.88   | 0.0610  |

|                |   |                        |         |        |       |       |        |
|----------------|---|------------------------|---------|--------|-------|-------|--------|
| NcoopUlag*numb | 2 | actor B14              | 1.0555  | 0.3627 | 535.3 | 2.91  | 0.0038 |
| NcoopUlag*numb | 3 | actor B14              | 0       | 0.5783 | 113.3 | 0.00  | 1.0000 |
| NcoopUlag*numb | 4 | actor B14              | 0       | 0.5783 | 113.3 | 0.00  | 1.0000 |
| NcoopUlag*numb | 5 | actor B14              | 0       | 0.5783 | 113.3 | 0.00  | 1.0000 |
| Intercept      |   | actor(actor_g) B15 B9  | -0.2224 | 0.4417 | 831.1 | -0.50 | 0.6147 |
| NcoopUlag*numb | 2 | actor B15              | 0.6126  | 0.3448 | 626   | 1.78  | 0.0761 |
| NcoopUlag*numb | 3 | actor B15              | 0       | 0.5783 | 113.3 | 0.00  | 1.0000 |
| NcoopUlag*numb | 4 | actor B15              | 0       | 0.5783 | 113.3 | 0.00  | 1.0000 |
| NcoopUlag*numb | 5 | actor B15              | 0       | 0.5783 | 113.3 | 0.00  | 1.0000 |
| Intercept      |   | actor(actor_g) B16 B10 | -0.5581 | 0.4472 | 825   | -1.25 | 0.2124 |
| NcoopUlag*numb | 2 | actor B16              | 0.5379  | 0.3176 | 712.7 | 1.69  | 0.0908 |
| NcoopUlag*numb | 3 | actor B16              | 0       | 0.5783 | 113.3 | 0.00  | 1.0000 |
| NcoopUlag*numb | 4 | actor B16              | 0       | 0.5783 | 113.3 | 0.00  | 1.0000 |
| NcoopUlag*numb | 5 | actor B16              | 0       | 0.5783 | 113.3 | 0.00  | 1.0000 |
| Intercept      |   | actor(actor_g) B17 B13 | -0.3784 | 0.4513 | 794.1 | -0.84 | 0.4020 |
| NcoopUlag*numb | 2 | actor B17              | 0.2552  | 0.3106 | 746.8 | 0.82  | 0.4115 |
| NcoopUlag*numb | 3 | actor B17              | 0       | 0.5783 | 113.3 | 0.00  | 1.0000 |
| NcoopUlag*numb | 4 | actor B17              | 0       | 0.5783 | 113.3 | 0.00  | 1.0000 |
| NcoopUlag*numb | 5 | actor B17              | 0       | 0.5783 | 113.3 | 0.00  | 1.0000 |
| Intercept      |   | actor(actor_g) B18 B7  | 1.4844  | 0.3985 | 1212  | 3.73  | 0.0002 |
| NcoopUlag*numb | 2 | actor B18              | -1.4220 | 0.2737 | 1190  | -5.19 | <.0001 |
| NcoopUlag*numb | 3 | actor B18              | 0       | 0.5783 | 113.3 | 0.00  | 1.0000 |
| NcoopUlag*numb | 4 | actor B18              | 0       | 0.5783 | 113.3 | 0.00  | 1.0000 |

|                  |                       |          |        |       |       |        |
|------------------|-----------------------|----------|--------|-------|-------|--------|
| NcoopUlag*numb 5 | actor B18             | 0        | 0.5783 | 113.3 | 0.00  | 1.0000 |
| Intercept        | actor(actor_g) B19 B5 | -0.4312  | 0.5244 | 575.5 | -0.82 | 0.4112 |
| NcoopUlag*numb 2 | actor B19             | 0.7218   | 0.3683 | 484.4 | 1.96  | 0.0506 |
| NcoopUlag*numb 3 | actor B19             | 0        | 0.5783 | 113.3 | 0.00  | 1.0000 |
| NcoopUlag*numb 4 | actor B19             | 0        | 0.5783 | 113.3 | 0.00  | 1.0000 |
| NcoopUlag*numb 5 | actor B19             | 0        | 0.5783 | 113.3 | 0.00  | 1.0000 |
| Intercept        | actor(actor_g) B2 B8  | -0.09561 | 0.4456 | 826.9 | -0.21 | 0.8302 |
| NcoopUlag*numb 2 | actor B2              | 0.08653  | 0.3091 | 751.5 | 0.28  | 0.7796 |
| NcoopUlag*numb 3 | actor B2              | 0        | 0.5783 | 113.3 | 0.00  | 1.0000 |



## The GLIMMIX Procedure

## Solution for Random Effects

| Effect         | numb | Subject                | Std Err  |        |       |         |         |
|----------------|------|------------------------|----------|--------|-------|---------|---------|
|                |      |                        | Estimate | Pred   | DF    | t Value | Pr >  t |
| NcoopUlag*numb | 4    | actor B2               | 0        | 0.5783 | 113.3 | 0.00    | 1.0000  |
| NcoopUlag*numb | 5    | actor B2               | 0        | 0.5783 | 113.3 | 0.00    | 1.0000  |
| Intercept      |      | actor(actor_g) B20 B2  | -0.2363  | 0.5391 | 544.6 | -0.44   | 0.6613  |
| NcoopUlag*numb | 2    | actor B20              | 0.4375   | 0.3522 | 509.9 | 1.24    | 0.2148  |
| NcoopUlag*numb | 3    | actor B20              | 0        | 0.5783 | 113.3 | 0.00    | 1.0000  |
| NcoopUlag*numb | 4    | actor B20              | 0        | 0.5783 | 113.3 | 0.00    | 1.0000  |
| NcoopUlag*numb | 5    | actor B20              | 0        | 0.5783 | 113.3 | 0.00    | 1.0000  |
| Intercept      |      | actor(actor_g) B21 B15 | -0.2709  | 0.4467 | 762.6 | -0.61   | 0.5444  |
| NcoopUlag*numb | 2    | actor B21              | 0.3869   | 0.3513 | 591.1 | 1.10    | 0.2712  |
| NcoopUlag*numb | 3    | actor B21              | 0        | 0.5783 | 113.3 | 0.00    | 1.0000  |
| NcoopUlag*numb | 4    | actor B21              | 0        | 0.5783 | 113.3 | 0.00    | 1.0000  |
| NcoopUlag*numb | 5    | actor B21              | 0        | 0.5783 | 113.3 | 0.00    | 1.0000  |
| Intercept      |      | actor(actor_g) B22 B3  | -1.3855  | 0.4218 | 833   | -3.28   | 0.0011  |
| NcoopUlag*numb | 2    | actor B22              | -0.00359 | 0.3143 | 757.5 | -0.01   | 0.9909  |

|                |   |                        |         |        |       |       |        |
|----------------|---|------------------------|---------|--------|-------|-------|--------|
| NcoopUlag*numb | 3 | actor B22              | 0       | 0.5783 | 113.3 | 0.00  | 1.0000 |
| NcoopUlag*numb | 4 | actor B22              | 0       | 0.5783 | 113.3 | 0.00  | 1.0000 |
| NcoopUlag*numb | 5 | actor B22              | 0       | 0.5783 | 113.3 | 0.00  | 1.0000 |
| Intercept      |   | actor(actor_g) B23 B8  | -0.3426 | 0.4598 | 765.8 | -0.75 | 0.4564 |
| NcoopUlag*numb | 2 | actor B23              | 0.3964  | 0.3312 | 651.2 | 1.20  | 0.2318 |
| NcoopUlag*numb | 3 | actor B23              | 0       | 0.5783 | 113.3 | 0.00  | 1.0000 |
| NcoopUlag*numb | 4 | actor B23              | 0       | 0.5783 | 113.3 | 0.00  | 1.0000 |
| NcoopUlag*numb | 5 | actor B23              | 0       | 0.5783 | 113.3 | 0.00  | 1.0000 |
| Intercept      |   | actor(actor_g) B24 B15 | 0.8527  | 0.3950 | 1069  | 2.16  | 0.0311 |
| NcoopUlag*numb | 2 | actor B24              | -1.0479 | 0.2656 | 1070  | -3.95 | <.0001 |
| NcoopUlag*numb | 3 | actor B24              | 0       | 0.5783 | 113.3 | 0.00  | 1.0000 |
| NcoopUlag*numb | 4 | actor B24              | 0       | 0.5783 | 113.3 | 0.00  | 1.0000 |
| NcoopUlag*numb | 5 | actor B24              | 0       | 0.5783 | 113.3 | 0.00  | 1.0000 |
| Intercept      |   | actor(actor_g) B25 B9  | -0.6777 | 0.4619 | 763.7 | -1.47 | 0.1428 |
| NcoopUlag*numb | 2 | actor B25              | 0.3083  | 0.3070 | 728.4 | 1.00  | 0.3157 |
| NcoopUlag*numb | 3 | actor B25              | 0       | 0.5783 | 113.3 | 0.00  | 1.0000 |
| NcoopUlag*numb | 4 | actor B25              | 0       | 0.5783 | 113.3 | 0.00  | 1.0000 |
| NcoopUlag*numb | 5 | actor B25              | 0       | 0.5783 | 113.3 | 0.00  | 1.0000 |
| Intercept      |   | actor(actor_g) B26 B11 | -0.3877 | 0.3382 | 996.9 | -1.15 | 0.2519 |
| NcoopUlag*numb | 2 | actor B26              | 0.2667  | 0.3179 | 782.3 | 0.84  | 0.4018 |
| NcoopUlag*numb | 3 | actor B26              | 0       | 0.5783 | 113.3 | 0.00  | 1.0000 |
| NcoopUlag*numb | 4 | actor B26              | 0       | 0.5783 | 113.3 | 0.00  | 1.0000 |
| NcoopUlag*numb | 5 | actor B26              | 0       | 0.5783 | 113.3 | 0.00  | 1.0000 |

|                  |                       |         |        |       |       |        |
|------------------|-----------------------|---------|--------|-------|-------|--------|
| Intercept        | actor(actor_g) B27 B4 | 0.5652  | 0.4256 | 926.9 | 1.33  | 0.1845 |
| NcoopUlag*numb 2 | actor B27             | -0.5149 | 0.2821 | 902.4 | -1.83 | 0.0683 |
| NcoopUlag*numb 3 | actor B27             | 0       | 0.5783 | 113.3 | 0.00  | 1.0000 |
| NcoopUlag*numb 4 | actor B27             | 0       | 0.5783 | 113.3 | 0.00  | 1.0000 |
| NcoopUlag*numb 5 | actor B27             | 0       | 0.5783 | 113.3 | 0.00  | 1.0000 |
| Intercept        | actor(actor_g) B28 B4 | -0.5454 | 0.4783 | 700   | -1.14 | 0.2546 |
| NcoopUlag*numb 2 | actor B28             | 0.5983  | 0.3505 | 566.8 | 1.71  | 0.0884 |
| NcoopUlag*numb 3 | actor B28             | 0       | 0.5783 | 113.3 | 0.00  | 1.0000 |
| NcoopUlag*numb 4 | actor B28             | 0       | 0.5783 | 113.3 | 0.00  | 1.0000 |

## The GLIMMIX Procedure

## Solution for Random Effects

| Effect         | numb | Subject               | Std Err  |        |       |         |         |
|----------------|------|-----------------------|----------|--------|-------|---------|---------|
|                |      |                       | Estimate | Pred   | DF    | t Value | Pr >  t |
| NcoopUlag*numb | 5    | actor B28             | 0        | 0.5783 | 113.3 | 0.00    | 1.0000  |
| Intercept      |      | actor(actor_g) B29 B6 | -0.7338  | 0.4076 | 932.2 | -1.80   | 0.0722  |
| NcoopUlag*numb | 2    | actor B29             | 0.07423  | 0.2908 | 870.4 | 0.26    | 0.7986  |
| NcoopUlag*numb | 3    | actor B29             | 0        | 0.5783 | 113.3 | 0.00    | 1.0000  |
| NcoopUlag*numb | 4    | actor B29             | 0        | 0.5783 | 113.3 | 0.00    | 1.0000  |
| NcoopUlag*numb | 5    | actor B29             | 0        | 0.5783 | 113.3 | 0.00    | 1.0000  |
| Intercept      |      | actor(actor_g) B3 B3  | 0.5612   | 0.3035 | 1042  | 1.85    | 0.0648  |
| NcoopUlag*numb | 2    | actor B3              | -0.7050  | 0.2771 | 1128  | -2.54   | 0.0111  |
| NcoopUlag*numb | 3    | actor B3              | 0        | 0.5783 | 113.3 | 0.00    | 1.0000  |
| NcoopUlag*numb | 4    | actor B3              | 0        | 0.5783 | 113.3 | 0.00    | 1.0000  |
| NcoopUlag*numb | 5    | actor B3              | 0        | 0.5783 | 113.3 | 0.00    | 1.0000  |
| Intercept      |      | actor(actor_g) B30 B6 | -0.04704 | 0.3675 | 1010  | -0.13   | 0.8982  |
| NcoopUlag*numb | 2    | actor B30             | 0.1023   | 0.3019 | 855.5 | 0.34    | 0.7347  |
| NcoopUlag*numb | 3    | actor B30             | 0        | 0.5783 | 113.3 | 0.00    | 1.0000  |

|                |   |                       |          |        |       |       |        |
|----------------|---|-----------------------|----------|--------|-------|-------|--------|
| NcoopUlag*numb | 4 | actor B30             | 0        | 0.5783 | 113.3 | 0.00  | 1.0000 |
| NcoopUlag*numb | 5 | actor B30             | 0        | 0.5783 | 113.3 | 0.00  | 1.0000 |
| Intercept      |   | actor(actor_g) B4 B2  | -0.1674  | 0.5476 | 531.9 | -0.31 | 0.7600 |
| NcoopUlag*numb | 2 | actor B4              | 0.6797   | 0.3774 | 448.3 | 1.80  | 0.0724 |
| NcoopUlag*numb | 3 | actor B4              | 0        | 0.5783 | 113.3 | 0.00  | 1.0000 |
| NcoopUlag*numb | 4 | actor B4              | 0        | 0.5783 | 113.3 | 0.00  | 1.0000 |
| NcoopUlag*numb | 5 | actor B4              | 0        | 0.5783 | 113.3 | 0.00  | 1.0000 |
| Intercept      |   | actor(actor_g) B5 B12 | 0.5914   | 0.4871 | 775.1 | 1.21  | 0.2251 |
| NcoopUlag*numb | 2 | actor B5              | -0.07018 | 0.3139 | 740.6 | -0.22 | 0.8231 |
| NcoopUlag*numb | 3 | actor B5              | 0        | 0.5783 | 113.3 | 0.00  | 1.0000 |
| NcoopUlag*numb | 4 | actor B5              | 0        | 0.5783 | 113.3 | 0.00  | 1.0000 |
| NcoopUlag*numb | 5 | actor B5              | 0        | 0.5783 | 113.3 | 0.00  | 1.0000 |
| Intercept      |   | actor(actor_g) B6 B13 | -0.00178 | 0.4344 | 863.2 | -0.00 | 0.9967 |
| NcoopUlag*numb | 2 | actor B6              | 0.2409   | 0.3174 | 760.5 | 0.76  | 0.4481 |
| NcoopUlag*numb | 3 | actor B6              | 0        | 0.5783 | 113.3 | 0.00  | 1.0000 |
| NcoopUlag*numb | 4 | actor B6              | 0        | 0.5783 | 113.3 | 0.00  | 1.0000 |
| NcoopUlag*numb | 5 | actor B6              | 0        | 0.5783 | 113.3 | 0.00  | 1.0000 |
| Intercept      |   | actor(actor_g) B7 B14 | 0.5391   | 0.7510 | 232.4 | 0.72  | 0.4736 |
| NcoopUlag*numb | 2 | actor B7              | 0.6835   | 0.4278 | 287.6 | 1.60  | 0.1112 |
| NcoopUlag*numb | 3 | actor B7              | 0        | 0.5783 | 113.3 | 0.00  | 1.0000 |
| NcoopUlag*numb | 4 | actor B7              | 0        | 0.5783 | 113.3 | 0.00  | 1.0000 |
| NcoopUlag*numb | 5 | actor B7              | 0        | 0.5783 | 113.3 | 0.00  | 1.0000 |
| Intercept      |   | actor(actor_g) B8 B5  | 0.1521   | 0.4981 | 670.6 | 0.31  | 0.7602 |

|                  |                      |         |        |       |       |        |
|------------------|----------------------|---------|--------|-------|-------|--------|
| NcoopUlag*numb 2 | actor B8             | 0.09719 | 0.3275 | 636   | 0.30  | 0.7668 |
| NcoopUlag*numb 3 | actor B8             | 0       | 0.5783 | 113.3 | 0.00  | 1.0000 |
| NcoopUlag*numb 4 | actor B8             | 0       | 0.5783 | 113.3 | 0.00  | 1.0000 |
| NcoopUlag*numb 5 | actor B8             | 0       | 0.5783 | 113.3 | 0.00  | 1.0000 |
| Intercept        | actor(actor_g) B9 B7 | 1.7064  | 0.3983 | 1223  | 4.28  | <.0001 |
| NcoopUlag*numb 2 | actor B9             | -1.6230 | 0.2703 | 1216  | -6.01 | <.0001 |
| NcoopUlag*numb 3 | actor B9             | 0       | 0.5783 | 113.3 | 0.00  | 1.0000 |
| NcoopUlag*numb 4 | actor B9             | 0       | 0.5783 | 113.3 | 0.00  | 1.0000 |
| NcoopUlag*numb 5 | actor B9             | 0       | 0.5783 | 113.3 | 0.00  | 1.0000 |

## The GLIMMIX Procedure

## Solution for Random Effects

| Effect         | numb | Subject               | Std Err  |        | DF    | t Value | Pr >  t |
|----------------|------|-----------------------|----------|--------|-------|---------|---------|
|                |      |                       | Estimate | Pred   |       |         |         |
| Intercept      |      | actor(actor_g) C1 C6  | 0.7538   | 0.4086 | 1020  | 1.84    | 0.0654  |
| NcoopUlag*numb | 2    | actor C1              | 0        | 0.5783 | 113.3 | 0.00    | 1.0000  |
| NcoopUlag*numb | 3    | actor C1              | 0.5059   | 0.2392 | 1048  | 2.11    | 0.0347  |
| NcoopUlag*numb | 4    | actor C1              | 0        | 0.5783 | 113.3 | 0.00    | 1.0000  |
| NcoopUlag*numb | 5    | actor C1              | 0        | 0.5783 | 113.3 | 0.00    | 1.0000  |
| Intercept      |      | actor(actor_g) C10 C1 | -1.3816  | 0.5694 | 529.5 | -2.43   | 0.0156  |
| NcoopUlag*numb | 2    | actor C10             | 0        | 0.5783 | 113.3 | 0.00    | 1.0000  |
| NcoopUlag*numb | 3    | actor C10             | -0.7273  | 0.3916 | 430.1 | -1.86   | 0.0639  |
| NcoopUlag*numb | 4    | actor C10             | 0        | 0.5783 | 113.3 | 0.00    | 1.0000  |
| NcoopUlag*numb | 5    | actor C10             | 0        | 0.5783 | 113.3 | 0.00    | 1.0000  |
| Intercept      |      | actor(actor_g) C11 C2 | 1.1018   | 0.3973 | 1164  | 2.77    | 0.0056  |
| NcoopUlag*numb | 2    | actor C11             | 0        | 0.5783 | 113.3 | 0.00    | 1.0000  |
| NcoopUlag*numb | 3    | actor C11             | -0.2321  | 0.2116 | 1145  | -1.10   | 0.2730  |
| NcoopUlag*numb | 4    | actor C11             | 0        | 0.5783 | 113.3 | 0.00    | 1.0000  |

|                  |                       |          |        |       |       |        |
|------------------|-----------------------|----------|--------|-------|-------|--------|
| NcoopUlag*numb 5 | actor C11             | 0        | 0.5783 | 113.3 | 0.00  | 1.0000 |
| Intercept        | actor(actor_g) C12 C4 | -0.1635  | 0.3521 | 1021  | -0.46 | 0.6424 |
| NcoopUlag*numb 2 | actor C12             | 0        | 0.5783 | 113.3 | 0.00  | 1.0000 |
| NcoopUlag*numb 3 | actor C12             | 0.5077   | 0.2567 | 1110  | 1.98  | 0.0482 |
| NcoopUlag*numb 4 | actor C12             | 0        | 0.5783 | 113.3 | 0.00  | 1.0000 |
| NcoopUlag*numb 5 | actor C12             | 0        | 0.5783 | 113.3 | 0.00  | 1.0000 |
| Intercept        | actor(actor_g) C13 C3 | -0.9917  | 0.4218 | 880.6 | -2.35 | 0.0189 |
| NcoopUlag*numb 2 | actor C13             | 0        | 0.5783 | 113.3 | 0.00  | 1.0000 |
| NcoopUlag*numb 3 | actor C13             | -0.06491 | 0.3384 | 717   | -0.19 | 0.8479 |
| NcoopUlag*numb 4 | actor C13             | 0        | 0.5783 | 113.3 | 0.00  | 1.0000 |
| NcoopUlag*numb 5 | actor C13             | 0        | 0.5783 | 113.3 | 0.00  | 1.0000 |
| Intercept        | actor(actor_g) C14 C2 | 0.8412   | 0.4035 | 1146  | 2.08  | 0.0373 |
| NcoopUlag*numb 2 | actor C14             | 0        | 0.5783 | 113.3 | 0.00  | 1.0000 |
| NcoopUlag*numb 3 | actor C14             | -0.2981  | 0.2097 | 1128  | -1.42 | 0.1553 |
| NcoopUlag*numb 4 | actor C14             | 0        | 0.5783 | 113.3 | 0.00  | 1.0000 |
| NcoopUlag*numb 5 | actor C14             | 0        | 0.5783 | 113.3 | 0.00  | 1.0000 |
| Intercept        | actor(actor_g) C15 C3 | -1.2817  | 0.4566 | 799.7 | -2.81 | 0.0051 |
| NcoopUlag*numb 2 | actor C15             | 0        | 0.5783 | 113.3 | 0.00  | 1.0000 |
| NcoopUlag*numb 3 | actor C15             | -0.1530  | 0.3678 | 562.8 | -0.42 | 0.6775 |
| NcoopUlag*numb 4 | actor C15             | 0        | 0.5783 | 113.3 | 0.00  | 1.0000 |
| NcoopUlag*numb 5 | actor C15             | 0        | 0.5783 | 113.3 | 0.00  | 1.0000 |
| Intercept        | actor(actor_g) C16 C6 | -0.3901  | 0.4562 | 909.6 | -0.86 | 0.3926 |
| NcoopUlag*numb 2 | actor C16             | 0        | 0.5783 | 113.3 | 0.00  | 1.0000 |



|                  |                       |        |        |       |      |        |
|------------------|-----------------------|--------|--------|-------|------|--------|
| NcoopUlag*numb 3 | actor C16             | 0.4186 | 0.2162 | 955.5 | 1.94 | 0.0531 |
| NcoopUlag*numb 4 | actor C16             | 0      | 0.5783 | 113.3 | 0.00 | 1.0000 |
| NcoopUlag*numb 5 | actor C16             | 0      | 0.5783 | 113.3 | 0.00 | 1.0000 |
| Intercept        | actor(actor_g) C17 C1 | 0.7175 | 0.3632 | 1026  | 1.98 | 0.0485 |
| NcoopUlag*numb 2 | actor C17             | 0      | 0.5783 | 113.3 | 0.00 | 1.0000 |
| NcoopUlag*numb 3 | actor C17             | 0.3998 | 0.2552 | 1056  | 1.57 | 0.1175 |
| NcoopUlag*numb 4 | actor C17             | 0      | 0.5783 | 113.3 | 0.00 | 1.0000 |
| NcoopUlag*numb 5 | actor C17             | 0      | 0.5783 | 113.3 | 0.00 | 1.0000 |
| Intercept        | actor(actor_g) C18 C3 | 0.8040 | 0.2982 | 932.2 | 2.70 | 0.0071 |

## The GLIMMIX Procedure

## Solution for Random Effects

| Effect         | numb | Subject              | Std Err  |        | DF    | t Value | Pr >  t |
|----------------|------|----------------------|----------|--------|-------|---------|---------|
|                |      |                      | Estimate | Pred   |       |         |         |
| NcoopUlag*numb | 2    | actor C18            | 0        | 0.5783 | 113.3 | 0.00    | 1.0000  |
| NcoopUlag*numb | 3    | actor C18            | 0.3751   | 0.2977 | 997.7 | 1.26    | 0.2080  |
| NcoopUlag*numb | 4    | actor C18            | 0        | 0.5783 | 113.3 | 0.00    | 1.0000  |
| NcoopUlag*numb | 5    | actor C18            | 0        | 0.5783 | 113.3 | 0.00    | 1.0000  |
| Intercept      |      | actor(actor_g) C2 C4 | -0.1317  | 0.3508 | 1013  | -0.38   | 0.7075  |
| NcoopUlag*numb | 2    | actor C2             | 0        | 0.5783 | 113.3 | 0.00    | 1.0000  |
| NcoopUlag*numb | 3    | actor C2             | 0.7216   | 0.2715 | 1047  | 2.66    | 0.0080  |
| NcoopUlag*numb | 4    | actor C2             | 0        | 0.5783 | 113.3 | 0.00    | 1.0000  |
| NcoopUlag*numb | 5    | actor C2             | 0        | 0.5783 | 113.3 | 0.00    | 1.0000  |
| Intercept      |      | actor(actor_g) C3 C5 | -1.1550  | 0.4362 | 818.7 | -2.65   | 0.0083  |
| NcoopUlag*numb | 2    | actor C3             | 0        | 0.5783 | 113.3 | 0.00    | 1.0000  |
| NcoopUlag*numb | 3    | actor C3             | -0.2955  | 0.4223 | 367.6 | -0.70   | 0.4845  |
| NcoopUlag*numb | 4    | actor C3             | 0        | 0.5783 | 113.3 | 0.00    | 1.0000  |
| NcoopUlag*numb | 5    | actor C3             | 0        | 0.5783 | 113.3 | 0.00    | 1.0000  |

|                  |                      |          |        |       |       |        |
|------------------|----------------------|----------|--------|-------|-------|--------|
| Intercept        | actor(actor_g) C4 C5 | 0.5535   | 0.2999 | 910.8 | 1.85  | 0.0653 |
| NcoopUlag*numb 2 | actor C4             | 0        | 0.5783 | 113.3 | 0.00  | 1.0000 |
| NcoopUlag*numb 3 | actor C4             | -0.08556 | 0.3084 | 944.6 | -0.28 | 0.7815 |
| NcoopUlag*numb 4 | actor C4             | 0        | 0.5783 | 113.3 | 0.00  | 1.0000 |
| NcoopUlag*numb 5 | actor C4             | 0        | 0.5783 | 113.3 | 0.00  | 1.0000 |
| Intercept        | actor(actor_g) C5 C4 | -0.1676  | 0.3688 | 1007  | -0.45 | 0.6496 |
| NcoopUlag*numb 2 | actor C5             | 0        | 0.5783 | 113.3 | 0.00  | 1.0000 |
| NcoopUlag*numb 3 | actor C5             | -0.7048  | 0.2824 | 1018  | -2.50 | 0.0127 |
| NcoopUlag*numb 4 | actor C5             | 0        | 0.5783 | 113.3 | 0.00  | 1.0000 |
| NcoopUlag*numb 5 | actor C5             | 0        | 0.5783 | 113.3 | 0.00  | 1.0000 |
| Intercept        | actor(actor_g) C6 C2 | 0.7328   | 0.4268 | 1035  | 1.72  | 0.0863 |
| NcoopUlag*numb 2 | actor C6             | 0        | 0.5783 | 113.3 | 0.00  | 1.0000 |
| NcoopUlag*numb 3 | actor C6             | 0.5466   | 0.2636 | 1042  | 2.07  | 0.0384 |
| NcoopUlag*numb 4 | actor C6             | 0        | 0.5783 | 113.3 | 0.00  | 1.0000 |
| NcoopUlag*numb 5 | actor C6             | 0        | 0.5783 | 113.3 | 0.00  | 1.0000 |
| Intercept        | actor(actor_g) C7 C6 | 0.5489   | 0.4079 | 1028  | 1.35  | 0.1787 |
| NcoopUlag*numb 2 | actor C7             | 0        | 0.5783 | 113.3 | 0.00  | 1.0000 |
| NcoopUlag*numb 3 | actor C7             | 0.3380   | 0.2174 | 1038  | 1.55  | 0.1203 |
| NcoopUlag*numb 4 | actor C7             | 0        | 0.5783 | 113.3 | 0.00  | 1.0000 |
| NcoopUlag*numb 5 | actor C7             | 0        | 0.5783 | 113.3 | 0.00  | 1.0000 |
| Intercept        | actor(actor_g) C8 C5 | -0.7811  | 0.3883 | 874.1 | -2.01 | 0.0446 |
| NcoopUlag*numb 2 | actor C8             | 0        | 0.5783 | 113.3 | 0.00  | 1.0000 |
| NcoopUlag*numb 3 | actor C8             | 0.2218   | 0.3600 | 611.5 | 0.62  | 0.5380 |

|                |   |                      |         |        |       |      |        |
|----------------|---|----------------------|---------|--------|-------|------|--------|
| NcoopUlag*numb | 4 | actor C8             | 0       | 0.5783 | 113.3 | 0.00 | 1.0000 |
| NcoopUlag*numb | 5 | actor C8             | 0       | 0.5783 | 113.3 | 0.00 | 1.0000 |
| Intercept      |   | actor(actor_g) C9 C1 | 0.09740 | 0.3932 | 970.3 | 0.25 | 0.8044 |
| NcoopUlag*numb | 2 | actor C9             | 0       | 0.5783 | 113.3 | 0.00 | 1.0000 |
| NcoopUlag*numb | 3 | actor C9             | 0.9219  | 0.2811 | 936.4 | 3.28 | 0.0011 |
| NcoopUlag*numb | 4 | actor C9             | 0       | 0.5783 | 113.3 | 0.00 | 1.0000 |
| NcoopUlag*numb | 5 | actor C9             | 0       | 0.5783 | 113.3 | 0.00 | 1.0000 |
| Intercept      |   | actor(actor_g) D1 D2 | 0.3635  | 0.3701 | 1139  | 0.98 | 0.3262 |
| NcoopUlag*numb | 2 | actor D1             | 0       | 0.5783 | 113.3 | 0.00 | 1.0000 |

## The GLIMMIX Procedure

## Solution for Random Effects

| Effect         | numb | Subject               | Std Err  |        | DF    | t Value | Pr >  t |
|----------------|------|-----------------------|----------|--------|-------|---------|---------|
|                |      |                       | Estimate | Pred   |       |         |         |
| NcoopUlag*numb | 3    | actor D1              | 0.4744   | 0.2629 | 1187  | 1.80    | 0.0714  |
| NcoopUlag*numb | 4    | actor D1              | 0        | 0.5783 | 113.3 | 0.00    | 1.0000  |
| NcoopUlag*numb | 5    | actor D1              | 0        | 0.5783 | 113.3 | 0.00    | 1.0000  |
| Intercept      |      | actor(actor_g) D10 D1 | -0.3326  | 0.3752 | 1032  | -0.89   | 0.3756  |
| NcoopUlag*numb | 2    | actor D10             | 0        | 0.5783 | 113.3 | 0.00    | 1.0000  |
| NcoopUlag*numb | 3    | actor D10             | 0.6157   | 0.2919 | 1038  | 2.11    | 0.0351  |
| NcoopUlag*numb | 4    | actor D10             | 0        | 0.5783 | 113.3 | 0.00    | 1.0000  |
| NcoopUlag*numb | 5    | actor D10             | 0        | 0.5783 | 113.3 | 0.00    | 1.0000  |
| Intercept      |      | actor(actor_g) D11 D3 | -0.3854  | 0.4083 | 1004  | -0.94   | 0.3454  |
| NcoopUlag*numb | 2    | actor D11             | 0        | 0.5783 | 113.3 | 0.00    | 1.0000  |
| NcoopUlag*numb | 3    | actor D11             | -0.1145  | 0.2659 | 1092  | -0.43   | 0.6668  |
| NcoopUlag*numb | 4    | actor D11             | 0        | 0.5783 | 113.3 | 0.00    | 1.0000  |
| NcoopUlag*numb | 5    | actor D11             | 0        | 0.5783 | 113.3 | 0.00    | 1.0000  |
| Intercept      |      | actor(actor_g) D12 D7 | 0.3605   | 0.3510 | 1112  | 1.03    | 0.3046  |

|                  |                       |          |        |       |       |        |
|------------------|-----------------------|----------|--------|-------|-------|--------|
| NcoopUlag*numb 2 | actor D12             | 0        | 0.5783 | 113.3 | 0.00  | 1.0000 |
| NcoopUlag*numb 3 | actor D12             | -0.2714  | 0.2601 | 1246  | -1.04 | 0.2969 |
| NcoopUlag*numb 4 | actor D12             | 0        | 0.5783 | 113.3 | 0.00  | 1.0000 |
| NcoopUlag*numb 5 | actor D12             | 0        | 0.5783 | 113.3 | 0.00  | 1.0000 |
| Intercept        | actor(actor_g) D13 D5 | -0.2867  | 0.3810 | 1045  | -0.75 | 0.4519 |
| NcoopUlag*numb 2 | actor D13             | 0        | 0.5783 | 113.3 | 0.00  | 1.0000 |
| NcoopUlag*numb 3 | actor D13             | 0.5431   | 0.2607 | 1122  | 2.08  | 0.0374 |
| NcoopUlag*numb 4 | actor D13             | 0        | 0.5783 | 113.3 | 0.00  | 1.0000 |
| NcoopUlag*numb 5 | actor D13             | 0        | 0.5783 | 113.3 | 0.00  | 1.0000 |
| Intercept        | actor(actor_g) D14 D2 | 0.5616   | 0.3595 | 1178  | 1.56  | 0.1186 |
| NcoopUlag*numb 2 | actor D14             | 0        | 0.5783 | 113.3 | 0.00  | 1.0000 |
| NcoopUlag*numb 3 | actor D14             | -0.2921  | 0.2358 | 1310  | -1.24 | 0.2157 |
| NcoopUlag*numb 4 | actor D14             | 0        | 0.5783 | 113.3 | 0.00  | 1.0000 |
| NcoopUlag*numb 5 | actor D14             | 0        | 0.5783 | 113.3 | 0.00  | 1.0000 |
| Intercept        | actor(actor_g) D15 D6 | 0.5846   | 0.3998 | 1142  | 1.46  | 0.1439 |
| NcoopUlag*numb 2 | actor D15             | 0        | 0.5783 | 113.3 | 0.00  | 1.0000 |
| NcoopUlag*numb 3 | actor D15             | -0.7957  | 0.2675 | 1182  | -2.97 | 0.0030 |
| NcoopUlag*numb 4 | actor D15             | 0        | 0.5783 | 113.3 | 0.00  | 1.0000 |
| NcoopUlag*numb 5 | actor D15             | 0        | 0.5783 | 113.3 | 0.00  | 1.0000 |
| Intercept        | actor(actor_g) D16 D7 | -0.08950 | 0.3706 | 1072  | -0.24 | 0.8092 |
| NcoopUlag*numb 2 | actor D16             | 0        | 0.5783 | 113.3 | 0.00  | 1.0000 |
| NcoopUlag*numb 3 | actor D16             | 0.7534   | 0.2863 | 1061  | 2.63  | 0.0086 |
| NcoopUlag*numb 4 | actor D16             | 0        | 0.5783 | 113.3 | 0.00  | 1.0000 |

|                  |                       |         |        |       |       |        |
|------------------|-----------------------|---------|--------|-------|-------|--------|
| NcoopUlag*numb 5 | actor D16             | 0       | 0.5783 | 113.3 | 0.00  | 1.0000 |
| Intercept        | actor(actor_g) D17 D3 | 0.1069  | 0.3648 | 1125  | 0.29  | 0.7696 |
| NcoopUlag*numb 2 | actor D17             | 0       | 0.5783 | 113.3 | 0.00  | 1.0000 |
| NcoopUlag*numb 3 | actor D17             | 0.2070  | 0.2444 | 1247  | 0.85  | 0.3970 |
| NcoopUlag*numb 4 | actor D17             | 0       | 0.5783 | 113.3 | 0.00  | 1.0000 |
| NcoopUlag*numb 5 | actor D17             | 0       | 0.5783 | 113.3 | 0.00  | 1.0000 |
| Intercept        | actor(actor_g) D18 D1 | -0.5073 | 0.4084 | 964.9 | -1.24 | 0.2145 |
| NcoopUlag*numb 2 | actor D18             | 0       | 0.5783 | 113.3 | 0.00  | 1.0000 |
| NcoopUlag*numb 3 | actor D18             | -0.3906 | 0.3167 | 870.2 | -1.23 | 0.2178 |

## The GLIMMIX Procedure

## Solution for Random Effects

| Effect         | numb | Subject               | Std Err  |        | DF    | t Value | Pr >  t |
|----------------|------|-----------------------|----------|--------|-------|---------|---------|
|                |      |                       | Estimate | Pred   |       |         |         |
| NcoopUlag*numb | 4    | actor D18             | 0        | 0.5783 | 113.3 | 0.00    | 1.0000  |
| NcoopUlag*numb | 5    | actor D18             | 0        | 0.5783 | 113.3 | 0.00    | 1.0000  |
| Intercept      |      | actor(actor_g) D19 D4 | 0.6008   | 0.3256 | 1099  | 1.84    | 0.0653  |
| NcoopUlag*numb | 2    | actor D19             | 0        | 0.5783 | 113.3 | 0.00    | 1.0000  |
| NcoopUlag*numb | 3    | actor D19             | -0.1417  | 0.2302 | 1337  | -0.62   | 0.5384  |
| NcoopUlag*numb | 4    | actor D19             | 0        | 0.5783 | 113.3 | 0.00    | 1.0000  |
| NcoopUlag*numb | 5    | actor D19             | 0        | 0.5783 | 113.3 | 0.00    | 1.0000  |
| Intercept      |      | actor(actor_g) D2 D8  | 0.8391   | 0.3624 | 1173  | 2.32    | 0.0208  |
| NcoopUlag*numb | 2    | actor D2              | 0        | 0.5783 | 113.3 | 0.00    | 1.0000  |
| NcoopUlag*numb | 3    | actor D2              | -0.1540  | 0.2178 | 1224  | -0.71   | 0.4795  |
| NcoopUlag*numb | 4    | actor D2              | 0        | 0.5783 | 113.3 | 0.00    | 1.0000  |
| NcoopUlag*numb | 5    | actor D2              | 0        | 0.5783 | 113.3 | 0.00    | 1.0000  |
| Intercept      |      | actor(actor_g) D20 D6 | 0.7262   | 0.3714 | 1187  | 1.96    | 0.0508  |
| NcoopUlag*numb | 2    | actor D20             | 0        | 0.5783 | 113.3 | 0.00    | 1.0000  |



|                  |                       |          |        |       |       |        |
|------------------|-----------------------|----------|--------|-------|-------|--------|
| NcoopUlag*numb 3 | actor D20             | -0.09048 | 0.2383 | 1268  | -0.38 | 0.7043 |
| NcoopUlag*numb 4 | actor D20             | 0        | 0.5783 | 113.3 | 0.00  | 1.0000 |
| NcoopUlag*numb 5 | actor D20             | 0        | 0.5783 | 113.3 | 0.00  | 1.0000 |
| Intercept        | actor(actor_g) D21 D5 | 0.01270  | 0.3967 | 1031  | 0.03  | 0.9745 |
| NcoopUlag*numb 2 | actor D21             | 0        | 0.5783 | 113.3 | 0.00  | 1.0000 |
| NcoopUlag*numb 3 | actor D21             | -1.5336  | 0.3843 | 510   | -3.99 | <.0001 |
| NcoopUlag*numb 4 | actor D21             | 0        | 0.5783 | 113.3 | 0.00  | 1.0000 |
| NcoopUlag*numb 5 | actor D21             | 0        | 0.5783 | 113.3 | 0.00  | 1.0000 |
| Intercept        | actor(actor_g) D22 D1 | 0.2622   | 0.3522 | 1084  | 0.74  | 0.4567 |
| NcoopUlag*numb 2 | actor D22             | 0        | 0.5783 | 113.3 | 0.00  | 1.0000 |
| NcoopUlag*numb 3 | actor D22             | -0.7367  | 0.2903 | 1088  | -2.54 | 0.0113 |
| NcoopUlag*numb 4 | actor D22             | 0        | 0.5783 | 113.3 | 0.00  | 1.0000 |
| NcoopUlag*numb 5 | actor D22             | 0        | 0.5783 | 113.3 | 0.00  | 1.0000 |
| Intercept        | actor(actor_g) D23 D3 | 0.4407   | 0.3498 | 1148  | 1.26  | 0.2079 |
| NcoopUlag*numb 2 | actor D23             | 0        | 0.5783 | 113.3 | 0.00  | 1.0000 |
| NcoopUlag*numb 3 | actor D23             | -0.2647  | 0.2329 | 1317  | -1.14 | 0.2560 |
| NcoopUlag*numb 4 | actor D23             | 0        | 0.5783 | 113.3 | 0.00  | 1.0000 |
| NcoopUlag*numb 5 | actor D23             | 0        | 0.5783 | 113.3 | 0.00  | 1.0000 |
| Intercept        | actor(actor_g) D24 D6 | 1.0911   | 0.3690 | 1196  | 2.96  | 0.0032 |
| NcoopUlag*numb 2 | actor D24             | 0        | 0.5783 | 113.3 | 0.00  | 1.0000 |
| NcoopUlag*numb 3 | actor D24             | -0.2177  | 0.2356 | 1269  | -0.92 | 0.3556 |
| NcoopUlag*numb 4 | actor D24             | 0        | 0.5783 | 113.3 | 0.00  | 1.0000 |
| NcoopUlag*numb 5 | actor D24             | 0        | 0.5783 | 113.3 | 0.00  | 1.0000 |

|                  |                      |          |        |       |       |        |
|------------------|----------------------|----------|--------|-------|-------|--------|
| Intercept        | actor(actor_g) D3 D4 | -1.5627  | 0.5281 | 615.1 | -2.96 | 0.0032 |
| NcoopUlag*numb 2 | actor D3             | 0        | 0.5783 | 113.3 | 0.00  | 1.0000 |
| NcoopUlag*numb 3 | actor D3             | -0.2783  | 0.3888 | 463.5 | -0.72 | 0.4745 |
| NcoopUlag*numb 4 | actor D3             | 0        | 0.5783 | 113.3 | 0.00  | 1.0000 |
| NcoopUlag*numb 5 | actor D3             | 0        | 0.5783 | 113.3 | 0.00  | 1.0000 |
| Intercept        | actor(actor_g) D4 D4 | -0.08090 | 0.3627 | 1099  | -0.22 | 0.8235 |
| NcoopUlag*numb 2 | actor D4             | 0        | 0.5783 | 113.3 | 0.00  | 1.0000 |
| NcoopUlag*numb 3 | actor D4             | 0.3518   | 0.2647 | 1206  | 1.33  | 0.1840 |
| NcoopUlag*numb 4 | actor D4             | 0        | 0.5783 | 113.3 | 0.00  | 1.0000 |

## The GLIMMIX Procedure

## Solution for Random Effects

| Effect         | numb | Subject              | Std Err  |        |       |         |         |
|----------------|------|----------------------|----------|--------|-------|---------|---------|
|                |      |                      | Estimate | Pred   | DF    | t Value | Pr >  t |
| NcoopUlag*numb | 5    | actor D4             | 0        | 0.5783 | 113.3 | 0.00    | 1.0000  |
| Intercept      |      | actor(actor_g) D5 D2 | -0.4706  | 0.4659 | 816.2 | -1.01   | 0.3128  |
| NcoopUlag*numb | 2    | actor D5             | 0        | 0.5783 | 113.3 | 0.00    | 1.0000  |
| NcoopUlag*numb | 3    | actor D5             | -0.8495  | 0.3548 | 624.6 | -2.39   | 0.0170  |
| NcoopUlag*numb | 4    | actor D5             | 0        | 0.5783 | 113.3 | 0.00    | 1.0000  |
| NcoopUlag*numb | 5    | actor D5             | 0        | 0.5783 | 113.3 | 0.00    | 1.0000  |
| Intercept      |      | actor(actor_g) D6 D7 | -1.0220  | 0.4999 | 729.4 | -2.04   | 0.0413  |
| NcoopUlag*numb | 2    | actor D6             | 0        | 0.5783 | 113.3 | 0.00    | 1.0000  |
| NcoopUlag*numb | 3    | actor D6             | -1.0466  | 0.4285 | 346.6 | -2.44   | 0.0151  |
| NcoopUlag*numb | 4    | actor D6             | 0        | 0.5783 | 113.3 | 0.00    | 1.0000  |
| NcoopUlag*numb | 5    | actor D6             | 0        | 0.5783 | 113.3 | 0.00    | 1.0000  |
| Intercept      |      | actor(actor_g) D7 D8 | -0.6930  | 0.4391 | 977.3 | -1.58   | 0.1148  |
| NcoopUlag*numb | 2    | actor D7             | 0        | 0.5783 | 113.3 | 0.00    | 1.0000  |
| NcoopUlag*numb | 3    | actor D7             | 0.2777   | 0.2403 | 1076  | 1.16    | 0.2482  |

|                |   |                       |          |        |       |       |        |
|----------------|---|-----------------------|----------|--------|-------|-------|--------|
| NcoopUlag*numb | 4 | actor D7              | 0        | 0.5783 | 113.3 | 0.00  | 1.0000 |
| NcoopUlag*numb | 5 | actor D7              | 0        | 0.5783 | 113.3 | 0.00  | 1.0000 |
| Intercept      |   | actor(actor_g) D8 D8  | 0.1079   | 0.4093 | 976.2 | 0.26  | 0.7921 |
| NcoopUlag*numb | 2 | actor D8              | 0        | 0.5783 | 113.3 | 0.00  | 1.0000 |
| NcoopUlag*numb | 3 | actor D8              | 0.8570   | 0.2920 | 913.4 | 2.93  | 0.0034 |
| NcoopUlag*numb | 4 | actor D8              | 0        | 0.5783 | 113.3 | 0.00  | 1.0000 |
| NcoopUlag*numb | 5 | actor D8              | 0        | 0.5783 | 113.3 | 0.00  | 1.0000 |
| Intercept      |   | actor(actor_g) D9 D5  | -0.3339  | 0.3836 | 1035  | -0.87 | 0.3843 |
| NcoopUlag*numb | 2 | actor D9              | 0        | 0.5783 | 113.3 | 0.00  | 1.0000 |
| NcoopUlag*numb | 3 | actor D9              | 0.7017   | 0.2639 | 1097  | 2.66  | 0.0080 |
| NcoopUlag*numb | 4 | actor D9              | 0        | 0.5783 | 113.3 | 0.00  | 1.0000 |
| NcoopUlag*numb | 5 | actor D9              | 0        | 0.5783 | 113.3 | 0.00  | 1.0000 |
| Intercept      |   | actor(actor_g) E1 E4  | -0.3607  | 0.3846 | 1336  | -0.94 | 0.3485 |
| NcoopUlag*numb | 2 | actor E1              | 0        | 0.5783 | 113.3 | 0.00  | 1.0000 |
| NcoopUlag*numb | 3 | actor E1              | 0        | 0.5783 | 113.3 | 0.00  | 1.0000 |
| NcoopUlag*numb | 4 | actor E1              | -0.00293 | 0.2135 | 1789  | -0.01 | 0.9890 |
| NcoopUlag*numb | 5 | actor E1              | 0        | 0.5783 | 113.3 | 0.00  | 1.0000 |
| Intercept      |   | actor(actor_g) E10 E4 | 0.2541   | 0.3316 | 1519  | 0.77  | 0.4437 |
| NcoopUlag*numb | 2 | actor E10             | 0        | 0.5783 | 113.3 | 0.00  | 1.0000 |
| NcoopUlag*numb | 3 | actor E10             | 0        | 0.5783 | 113.3 | 0.00  | 1.0000 |
| NcoopUlag*numb | 4 | actor E10             | 0.07503  | 0.1949 | 1906  | 0.38  | 0.7004 |
| NcoopUlag*numb | 5 | actor E10             | 0        | 0.5783 | 113.3 | 0.00  | 1.0000 |
| Intercept      |   | actor(actor_g) E11 E3 | 0.9177   | 0.3260 | 1666  | 2.81  | 0.0049 |

|                  |                       |         |        |       |       |        |
|------------------|-----------------------|---------|--------|-------|-------|--------|
| NcoopUlag*numb 2 | actor E11             | 0       | 0.5783 | 113.3 | 0.00  | 1.0000 |
| NcoopUlag*numb 3 | actor E11             | 0       | 0.5783 | 113.3 | 0.00  | 1.0000 |
| NcoopUlag*numb 4 | actor E11             | -0.1279 | 0.1904 | 1963  | -0.67 | 0.5018 |
| NcoopUlag*numb 5 | actor E11             | 0       | 0.5783 | 113.3 | 0.00  | 1.0000 |
| Intercept        | actor(actor_g) E12 E3 | -0.5820 | 0.4292 | 1154  | -1.36 | 0.1754 |
| NcoopUlag*numb 2 | actor E12             | 0       | 0.5783 | 113.3 | 0.00  | 1.0000 |
| NcoopUlag*numb 3 | actor E12             | 0       | 0.5783 | 113.3 | 0.00  | 1.0000 |
| NcoopUlag*numb 4 | actor E12             | 0.05243 | 0.2215 | 1517  | 0.24  | 0.8129 |
| NcoopUlag*numb 5 | actor E12             | 0       | 0.5783 | 113.3 | 0.00  | 1.0000 |

## The GLIMMIX Procedure

## Solution for Random Effects

| Effect         | numb | Subject               | Std Err  |        | DF    | t Value | Pr >  t |
|----------------|------|-----------------------|----------|--------|-------|---------|---------|
|                |      |                       | Estimate | Pred   |       |         |         |
| Intercept      |      | actor(actor_g) E13 E1 | 0.5708   | 0.3468 | 1438  | 1.65    | 0.1000  |
| NcoopUlag*numb | 2    | actor E13             | 0        | 0.5783 | 113.3 | 0.00    | 1.0000  |
| NcoopUlag*numb | 3    | actor E13             | 0        | 0.5783 | 113.3 | 0.00    | 1.0000  |
| NcoopUlag*numb | 4    | actor E13             | 0.1029   | 0.2046 | 1628  | 0.50    | 0.6150  |
| NcoopUlag*numb | 5    | actor E13             | 0        | 0.5783 | 113.3 | 0.00    | 1.0000  |
| Intercept      |      | actor(actor_g) E14 E2 | 0.8052   | 0.3492 | 1577  | 2.31    | 0.0212  |
| NcoopUlag*numb | 2    | actor E14             | 0        | 0.5783 | 113.3 | 0.00    | 1.0000  |
| NcoopUlag*numb | 3    | actor E14             | 0        | 0.5783 | 113.3 | 0.00    | 1.0000  |
| NcoopUlag*numb | 4    | actor E14             | 0.1984   | 0.2260 | 1766  | 0.88    | 0.3803  |
| NcoopUlag*numb | 5    | actor E14             | 0        | 0.5783 | 113.3 | 0.00    | 1.0000  |
| Intercept      |      | actor(actor_g) E15 E2 | -0.1511  | 0.4361 | 1112  | -0.35   | 0.7291  |
| NcoopUlag*numb | 2    | actor E15             | 0        | 0.5783 | 113.3 | 0.00    | 1.0000  |
| NcoopUlag*numb | 3    | actor E15             | 0        | 0.5783 | 113.3 | 0.00    | 1.0000  |
| NcoopUlag*numb | 4    | actor E15             | -0.5011  | 0.2742 | 1224  | -1.83   | 0.0679  |

|                  |                       |         |        |       |       |        |
|------------------|-----------------------|---------|--------|-------|-------|--------|
| NcoopUlag*numb 5 | actor E15             | 0       | 0.5783 | 113.3 | 0.00  | 1.0000 |
| Intercept        | actor(actor_g) E16 E3 | 0.9193  | 0.3305 | 1675  | 2.78  | 0.0055 |
| NcoopUlag*numb 2 | actor E16             | 0       | 0.5783 | 113.3 | 0.00  | 1.0000 |
| NcoopUlag*numb 3 | actor E16             | 0       | 0.5783 | 113.3 | 0.00  | 1.0000 |
| NcoopUlag*numb 4 | actor E16             | 0.1369  | 0.2048 | 1947  | 0.67  | 0.5040 |
| NcoopUlag*numb 5 | actor E16             | 0       | 0.5783 | 113.3 | 0.00  | 1.0000 |
| Intercept        | actor(actor_g) E2 E1  | -0.9051 | 0.5304 | 686.5 | -1.71 | 0.0884 |
| NcoopUlag*numb 2 | actor E2              | 0       | 0.5783 | 113.3 | 0.00  | 1.0000 |
| NcoopUlag*numb 3 | actor E2              | 0       | 0.5783 | 113.3 | 0.00  | 1.0000 |
| NcoopUlag*numb 4 | actor E2              | -0.7680 | 0.3687 | 550.3 | -2.08 | 0.0377 |
| NcoopUlag*numb 5 | actor E2              | 0       | 0.5783 | 113.3 | 0.00  | 1.0000 |
| Intercept        | actor(actor_g) E3 E2  | -0.1537 | 0.4400 | 1082  | -0.35 | 0.7269 |
| NcoopUlag*numb 2 | actor E3              | 0       | 0.5783 | 113.3 | 0.00  | 1.0000 |
| NcoopUlag*numb 3 | actor E3              | 0       | 0.5783 | 113.3 | 0.00  | 1.0000 |
| NcoopUlag*numb 4 | actor E3              | -0.5677 | 0.2799 | 1168  | -2.03 | 0.0428 |
| NcoopUlag*numb 5 | actor E3              | 0       | 0.5783 | 113.3 | 0.00  | 1.0000 |
| Intercept        | actor(actor_g) E4 E2  | 0.2501  | 0.3733 | 1452  | 0.67  | 0.5030 |
| NcoopUlag*numb 2 | actor E4              | 0       | 0.5783 | 113.3 | 0.00  | 1.0000 |
| NcoopUlag*numb 3 | actor E4              | 0       | 0.5783 | 113.3 | 0.00  | 1.0000 |
| NcoopUlag*numb 4 | actor E4              | 0.4716  | 0.2335 | 1600  | 2.02  | 0.0436 |
| NcoopUlag*numb 5 | actor E4              | 0       | 0.5783 | 113.3 | 0.00  | 1.0000 |
| Intercept        | actor(actor_g) E5 E1  | -0.9506 | 0.4660 | 976.6 | -2.04 | 0.0416 |
| NcoopUlag*numb 2 | actor E5              | 0       | 0.5783 | 113.3 | 0.00  | 1.0000 |

|                  |                      |         |        |       |       |        |
|------------------|----------------------|---------|--------|-------|-------|--------|
| NcoopUlag*numb 3 | actor E5             | 0       | 0.5783 | 113.3 | 0.00  | 1.0000 |
| NcoopUlag*numb 4 | actor E5             | 0.2200  | 0.2287 | 1274  | 0.96  | 0.3362 |
| NcoopUlag*numb 5 | actor E5             | 0       | 0.5783 | 113.3 | 0.00  | 1.0000 |
| Intercept        | actor(actor_g) E6 E3 | -0.9065 | 0.4812 | 901.2 | -1.88 | 0.0599 |
| NcoopUlag*numb 2 | actor E6             | 0       | 0.5783 | 113.3 | 0.00  | 1.0000 |
| NcoopUlag*numb 3 | actor E6             | 0       | 0.5783 | 113.3 | 0.00  | 1.0000 |
| NcoopUlag*numb 4 | actor E6             | -0.1370 | 0.2625 | 1183  | -0.52 | 0.6018 |
| NcoopUlag*numb 5 | actor E6             | 0       | 0.5783 | 113.3 | 0.00  | 1.0000 |
| Intercept        | actor(actor_g) E7 E4 | 0.3684  | 0.3272 | 1529  | 1.13  | 0.2605 |



## The GLIMMIX Procedure

## Solution for Random Effects

| Effect         | numb | Subject              | Std Err  |        |       |         |         |
|----------------|------|----------------------|----------|--------|-------|---------|---------|
|                |      |                      | Estimate | Pred   | DF    | t Value | Pr >  t |
| NcoopUlag*numb | 2    | actor E7             | 0        | 0.5783 | 113.3 | 0.00    | 1.0000  |
| NcoopUlag*numb | 3    | actor E7             | 0        | 0.5783 | 113.3 | 0.00    | 1.0000  |
| NcoopUlag*numb | 4    | actor E7             | -0.03324 | 0.1959 | 1946  | -0.17   | 0.8653  |
| NcoopUlag*numb | 5    | actor E7             | 0        | 0.5783 | 113.3 | 0.00    | 1.0000  |
| Intercept      |      | actor(actor_g) E8 E1 | 0.2421   | 0.3756 | 1290  | 0.64    | 0.5194  |
| NcoopUlag*numb | 2    | actor E8             | 0        | 0.5783 | 113.3 | 0.00    | 1.0000  |
| NcoopUlag*numb | 3    | actor E8             | 0        | 0.5783 | 113.3 | 0.00    | 1.0000  |
| NcoopUlag*numb | 4    | actor E8             | 1.0026   | 0.2716 | 1217  | 3.69    | 0.0002  |
| NcoopUlag*numb | 5    | actor E8             | 0        | 0.5783 | 113.3 | 0.00    | 1.0000  |
| Intercept      |      | actor(actor_g) E9 E4 | -0.03420 | 0.3545 | 1431  | -0.10   | 0.9232  |
| NcoopUlag*numb | 2    | actor E9             | 0        | 0.5783 | 113.3 | 0.00    | 1.0000  |
| NcoopUlag*numb | 3    | actor E9             | 0        | 0.5783 | 113.3 | 0.00    | 1.0000  |
| NcoopUlag*numb | 4    | actor E9             | 0.08591  | 0.2104 | 1823  | 0.41    | 0.6831  |
| NcoopUlag*numb | 5    | actor E9             | 0        | 0.5783 | 113.3 | 0.00    | 1.0000  |

|                  |                       |         |        |       |       |        |
|------------------|-----------------------|---------|--------|-------|-------|--------|
| Intercept        | actor(actor_g) F1 F3  | -0.6275 | 0.4956 | 851.3 | -1.27 | 0.2058 |
| NcoopUlag*numb 2 | actor F1              | 0       | 0.5783 | 113.3 | 0.00  | 1.0000 |
| NcoopUlag*numb 3 | actor F1              | 0       | 0.5783 | 113.3 | 0.00  | 1.0000 |
| NcoopUlag*numb 4 | actor F1              | -0.3461 | 0.2846 | 1033  | -1.22 | 0.2243 |
| NcoopUlag*numb 5 | actor F1              | 0       | 0.5783 | 113.3 | 0.00  | 1.0000 |
| Intercept        | actor(actor_g) F10 F1 | 1.1808  | 0.3457 | 1908  | 3.42  | 0.0006 |
| NcoopUlag*numb 2 | actor F10             | 0       | 0.5783 | 113.3 | 0.00  | 1.0000 |
| NcoopUlag*numb 3 | actor F10             | 0       | 0.5783 | 113.3 | 0.00  | 1.0000 |
| NcoopUlag*numb 4 | actor F10             | 0.03155 | 0.1884 | 2078  | 0.17  | 0.8670 |
| NcoopUlag*numb 5 | actor F10             | 0       | 0.5783 | 113.3 | 0.00  | 1.0000 |
| Intercept        | actor(actor_g) F11 F1 | 0.4845  | 0.3783 | 1562  | 1.28  | 0.2005 |
| NcoopUlag*numb 2 | actor F11             | 0       | 0.5783 | 113.3 | 0.00  | 1.0000 |
| NcoopUlag*numb 3 | actor F11             | 0       | 0.5783 | 113.3 | 0.00  | 1.0000 |
| NcoopUlag*numb 4 | actor F11             | -0.3681 | 0.2029 | 1863  | -1.81 | 0.0698 |
| NcoopUlag*numb 5 | actor F11             | 0       | 0.5783 | 113.3 | 0.00  | 1.0000 |
| Intercept        | actor(actor_g) F12 F4 | 0.5915  | 0.3393 | 1499  | 1.74  | 0.0815 |
| NcoopUlag*numb 2 | actor F12             | 0       | 0.5783 | 113.3 | 0.00  | 1.0000 |
| NcoopUlag*numb 3 | actor F12             | 0       | 0.5783 | 113.3 | 0.00  | 1.0000 |
| NcoopUlag*numb 4 | actor F12             | -0.4151 | 0.1971 | 1802  | -2.11 | 0.0353 |
| NcoopUlag*numb 5 | actor F12             | 0       | 0.5783 | 113.3 | 0.00  | 1.0000 |
| Intercept        | actor(actor_g) F13 F5 | 1.0719  | 0.3417 | 1667  | 3.14  | 0.0017 |
| NcoopUlag*numb 2 | actor F13             | 0       | 0.5783 | 113.3 | 0.00  | 1.0000 |
| NcoopUlag*numb 3 | actor F13             | 0       | 0.5783 | 113.3 | 0.00  | 1.0000 |

|                |   |                       |         |        |       |       |        |
|----------------|---|-----------------------|---------|--------|-------|-------|--------|
| NcoopUlag*numb | 4 | actor F13             | -0.4885 | 0.1848 | 1903  | -2.64 | 0.0083 |
| NcoopUlag*numb | 5 | actor F13             | 0       | 0.5783 | 113.3 | 0.00  | 1.0000 |
| Intercept      |   | actor(actor_g) F14 F3 | 0.1227  | 0.3840 | 1561  | 0.32  | 0.7494 |
| NcoopUlag*numb | 2 | actor F14             | 0       | 0.5783 | 113.3 | 0.00  | 1.0000 |
| NcoopUlag*numb | 3 | actor F14             | 0       | 0.5783 | 113.3 | 0.00  | 1.0000 |
| NcoopUlag*numb | 4 | actor F14             | 0.5101  | 0.2230 | 1748  | 2.29  | 0.0223 |
| NcoopUlag*numb | 5 | actor F14             | 0       | 0.5783 | 113.3 | 0.00  | 1.0000 |
| Intercept      |   | actor(actor_g) F15 F2 | -0.6314 | 0.4147 | 1208  | -1.52 | 0.1281 |
| NcoopUlag*numb | 2 | actor F15             | 0       | 0.5783 | 113.3 | 0.00  | 1.0000 |

## The GLIMMIX Procedure

## Solution for Random Effects

| Effect         | numb | Subject               | Std Err  |        |       |         |         |
|----------------|------|-----------------------|----------|--------|-------|---------|---------|
|                |      |                       | Estimate | Pred   | DF    | t Value | Pr >  t |
| NcoopUlag*numb | 3    | actor F15             | 0        | 0.5783 | 113.3 | 0.00    | 1.0000  |
| NcoopUlag*numb | 4    | actor F15             | -0.6412  | 0.3277 | 920.1 | -1.96   | 0.0507  |
| NcoopUlag*numb | 5    | actor F15             | 0        | 0.5783 | 113.3 | 0.00    | 1.0000  |
| Intercept      |      | actor(actor_g) F16 F3 | 1.3048   | 0.3440 | 1831  | 3.79    | 0.0002  |
| NcoopUlag*numb | 2    | actor F16             | 0        | 0.5783 | 113.3 | 0.00    | 1.0000  |
| NcoopUlag*numb | 3    | actor F16             | 0        | 0.5783 | 113.3 | 0.00    | 1.0000  |
| NcoopUlag*numb | 4    | actor F16             | -0.2325  | 0.1948 | 2055  | -1.19   | 0.2329  |
| NcoopUlag*numb | 5    | actor F16             | 0        | 0.5783 | 113.3 | 0.00    | 1.0000  |
| Intercept      |      | actor(actor_g) F17 F2 | -1.9340  | 0.5897 | 550.1 | -3.28   | 0.0011  |
| NcoopUlag*numb | 2    | actor F17             | 0        | 0.5783 | 113.3 | 0.00    | 1.0000  |
| NcoopUlag*numb | 3    | actor F17             | 0        | 0.5783 | 113.3 | 0.00    | 1.0000  |
| NcoopUlag*numb | 4    | actor F17             | -0.5673  | 0.4363 | 334.9 | -1.30   | 0.1944  |
| NcoopUlag*numb | 5    | actor F17             | 0        | 0.5783 | 113.3 | 0.00    | 1.0000  |
| Intercept      |      | actor(actor_g) F18 F4 | -0.4251  | 0.3872 | 1336  | -1.10   | 0.2725  |

|                |   |                       |          |        |       |       |        |
|----------------|---|-----------------------|----------|--------|-------|-------|--------|
| NcoopUlag*numb | 2 | actor F18             | 0        | 0.5783 | 113.3 | 0.00  | 1.0000 |
| NcoopUlag*numb | 3 | actor F18             | 0        | 0.5783 | 113.3 | 0.00  | 1.0000 |
| NcoopUlag*numb | 4 | actor F18             | 0.7337   | 0.2332 | 1523  | 3.15  | 0.0017 |
| NcoopUlag*numb | 5 | actor F18             | 0        | 0.5783 | 113.3 | 0.00  | 1.0000 |
| Intercept      |   | actor(actor_g) F19 F5 | -0.3513  | 0.4177 | 1220  | -0.84 | 0.4005 |
| NcoopUlag*numb | 2 | actor F19             | 0        | 0.5783 | 113.3 | 0.00  | 1.0000 |
| NcoopUlag*numb | 3 | actor F19             | 0        | 0.5783 | 113.3 | 0.00  | 1.0000 |
| NcoopUlag*numb | 4 | actor F19             | 1.0965   | 0.2637 | 1274  | 4.16  | <.0001 |
| NcoopUlag*numb | 5 | actor F19             | 0        | 0.5783 | 113.3 | 0.00  | 1.0000 |
| Intercept      |   | actor(actor_g) F2 F3  | 0.6041   | 0.3872 | 1486  | 1.56  | 0.1189 |
| NcoopUlag*numb | 2 | actor F2              | 0        | 0.5783 | 113.3 | 0.00  | 1.0000 |
| NcoopUlag*numb | 3 | actor F2              | 0        | 0.5783 | 113.3 | 0.00  | 1.0000 |
| NcoopUlag*numb | 4 | actor F2              | -0.6422  | 0.2314 | 1720  | -2.78 | 0.0056 |
| NcoopUlag*numb | 5 | actor F2              | 0        | 0.5783 | 113.3 | 0.00  | 1.0000 |
| Intercept      |   | actor(actor_g) F20 F5 | 0.1368   | 0.3876 | 1418  | 0.35  | 0.7242 |
| NcoopUlag*numb | 2 | actor F20             | 0        | 0.5783 | 113.3 | 0.00  | 1.0000 |
| NcoopUlag*numb | 3 | actor F20             | 0        | 0.5783 | 113.3 | 0.00  | 1.0000 |
| NcoopUlag*numb | 4 | actor F20             | -0.09774 | 0.1959 | 1707  | -0.50 | 0.6180 |
| NcoopUlag*numb | 5 | actor F20             | 0        | 0.5783 | 113.3 | 0.00  | 1.0000 |
| Intercept      |   | actor(actor_g) F3 F2  | -1.1235  | 0.4437 | 1102  | -2.53 | 0.0115 |
| NcoopUlag*numb | 2 | actor F3              | 0        | 0.5783 | 113.3 | 0.00  | 1.0000 |
| NcoopUlag*numb | 3 | actor F3              | 0        | 0.5783 | 113.3 | 0.00  | 1.0000 |
| NcoopUlag*numb | 4 | actor F3              | 0.2151   | 0.2249 | 1723  | 0.96  | 0.3389 |

|                  |                      |         |        |       |       |        |
|------------------|----------------------|---------|--------|-------|-------|--------|
| NcoopUlag*numb 5 | actor F3             | 0       | 0.5783 | 113.3 | 0.00  | 1.0000 |
| Intercept        | actor(actor_g) F4 F2 | 0.2587  | 0.3085 | 1665  | 0.84  | 0.4018 |
| NcoopUlag*numb 2 | actor F4             | 0       | 0.5783 | 113.3 | 0.00  | 1.0000 |
| NcoopUlag*numb 3 | actor F4             | 0       | 0.5783 | 113.3 | 0.00  | 1.0000 |
| NcoopUlag*numb 4 | actor F4             | 0.1594  | 0.1834 | 2236  | 0.87  | 0.3849 |
| NcoopUlag*numb 5 | actor F4             | 0       | 0.5783 | 113.3 | 0.00  | 1.0000 |
| Intercept        | actor(actor_g) F5 F4 | -1.4252 | 0.5199 | 748   | -2.74 | 0.0063 |
| NcoopUlag*numb 2 | actor F5             | 0       | 0.5783 | 113.3 | 0.00  | 1.0000 |
| NcoopUlag*numb 3 | actor F5             | 0       | 0.5783 | 113.3 | 0.00  | 1.0000 |

## The GLIMMIX Procedure

## Solution for Random Effects

| Effect         | numb | Subject              | Std Err  |        |       |         |         |
|----------------|------|----------------------|----------|--------|-------|---------|---------|
|                |      |                      | Estimate | Pred   | DF    | t Value | Pr >  t |
| NcoopUlag*numb | 4    | actor F5             | 0.06436  | 0.2560 | 1087  | 0.25    | 0.8016  |
| NcoopUlag*numb | 5    | actor F5             | 0        | 0.5783 | 113.3 | 0.00    | 1.0000  |
| Intercept      |      | actor(actor_g) F6 F5 | 0.4971   | 0.3807 | 1495  | 1.31    | 0.1919  |
| NcoopUlag*numb | 2    | actor F6             | 0        | 0.5783 | 113.3 | 0.00    | 1.0000  |
| NcoopUlag*numb | 3    | actor F6             | 0        | 0.5783 | 113.3 | 0.00    | 1.0000  |
| NcoopUlag*numb | 4    | actor F6             | -0.4822  | 0.2051 | 1813  | -2.35   | 0.0188  |
| NcoopUlag*numb | 5    | actor F6             | 0        | 0.5783 | 113.3 | 0.00    | 1.0000  |
| Intercept      |      | actor(actor_g) F7 F1 | 0.3096   | 0.3809 | 1609  | 0.81    | 0.4165  |
| NcoopUlag*numb | 2    | actor F7             | 0        | 0.5783 | 113.3 | 0.00    | 1.0000  |
| NcoopUlag*numb | 3    | actor F7             | 0        | 0.5783 | 113.3 | 0.00    | 1.0000  |
| NcoopUlag*numb | 4    | actor F7             | -0.2130  | 0.1916 | 1915  | -1.11   | 0.2665  |
| NcoopUlag*numb | 5    | actor F7             | 0        | 0.5783 | 113.3 | 0.00    | 1.0000  |
| Intercept      |      | actor(actor_g) F8 F1 | 0.1374   | 0.3813 | 1521  | 0.36    | 0.7186  |
| NcoopUlag*numb | 2    | actor F8             | 0        | 0.5783 | 113.3 | 0.00    | 1.0000  |

|                |   |                       |          |        |       |       |        |
|----------------|---|-----------------------|----------|--------|-------|-------|--------|
| NcoopUlag*numb | 3 | actor F8              | 0        | 0.5783 | 113.3 | 0.00  | 1.0000 |
| NcoopUlag*numb | 4 | actor F8              | 0.07801  | 0.1995 | 1809  | 0.39  | 0.6958 |
| NcoopUlag*numb | 5 | actor F8              | 0        | 0.5783 | 113.3 | 0.00  | 1.0000 |
| Intercept      |   | actor(actor_g) F9 F4  | 0.3878   | 0.3408 | 1505  | 1.14  | 0.2552 |
| NcoopUlag*numb | 2 | actor F9              | 0        | 0.5783 | 113.3 | 0.00  | 1.0000 |
| NcoopUlag*numb | 3 | actor F9              | 0        | 0.5783 | 113.3 | 0.00  | 1.0000 |
| NcoopUlag*numb | 4 | actor F9              | 0.3363   | 0.2055 | 1730  | 1.64  | 0.1019 |
| NcoopUlag*numb | 5 | actor F9              | 0        | 0.5783 | 113.3 | 0.00  | 1.0000 |
| Intercept      |   | actor(actor_g) G1 G2  | 0.1666   | 0.3519 | 1378  | 0.47  | 0.6359 |
| NcoopUlag*numb | 2 | actor G1              | 0        | 0.5783 | 113.3 | 0.00  | 1.0000 |
| NcoopUlag*numb | 3 | actor G1              | 0        | 0.5783 | 113.3 | 0.00  | 1.0000 |
| NcoopUlag*numb | 4 | actor G1              | 0.3781   | 0.2220 | 1577  | 1.70  | 0.0886 |
| NcoopUlag*numb | 5 | actor G1              | 0        | 0.5783 | 113.3 | 0.00  | 1.0000 |
| Intercept      |   | actor(actor_g) G10 G1 | 0.1965   | 0.3263 | 1404  | 0.60  | 0.5471 |
| NcoopUlag*numb | 2 | actor G10             | 0        | 0.5783 | 113.3 | 0.00  | 1.0000 |
| NcoopUlag*numb | 3 | actor G10             | 0        | 0.5783 | 113.3 | 0.00  | 1.0000 |
| NcoopUlag*numb | 4 | actor G10             | 0.02405  | 0.2328 | 1729  | 0.10  | 0.9177 |
| NcoopUlag*numb | 5 | actor G10             | 0        | 0.5783 | 113.3 | 0.00  | 1.0000 |
| Intercept      |   | actor(actor_g) G11 G4 | -1.1542  | 0.4997 | 803.7 | -2.31 | 0.0212 |
| NcoopUlag*numb | 2 | actor G11             | 0        | 0.5783 | 113.3 | 0.00  | 1.0000 |
| NcoopUlag*numb | 3 | actor G11             | 0        | 0.5783 | 113.3 | 0.00  | 1.0000 |
| NcoopUlag*numb | 4 | actor G11             | -0.01520 | 0.2813 | 1032  | -0.05 | 0.9569 |
| NcoopUlag*numb | 5 | actor G11             | 0        | 0.5783 | 113.3 | 0.00  | 1.0000 |



|                  |                       |         |        |       |       |        |
|------------------|-----------------------|---------|--------|-------|-------|--------|
| Intercept        | actor(actor_g) G12 G4 | 0.1926  | 0.3627 | 1470  | 0.53  | 0.5954 |
| NcoopUlag*numb 2 | actor G12             | 0       | 0.5783 | 113.3 | 0.00  | 1.0000 |
| NcoopUlag*numb 3 | actor G12             | 0       | 0.5783 | 113.3 | 0.00  | 1.0000 |
| NcoopUlag*numb 4 | actor G12             | 0.3048  | 0.2322 | 1700  | 1.31  | 0.1895 |
| NcoopUlag*numb 5 | actor G12             | 0       | 0.5783 | 113.3 | 0.00  | 1.0000 |
| Intercept        | actor(actor_g) G13 G1 | -0.5964 | 0.3914 | 1179  | -1.52 | 0.1279 |
| NcoopUlag*numb 2 | actor G13             | 0       | 0.5783 | 113.3 | 0.00  | 1.0000 |
| NcoopUlag*numb 3 | actor G13             | 0       | 0.5783 | 113.3 | 0.00  | 1.0000 |
| NcoopUlag*numb 4 | actor G13             | 0.1979  | 0.2544 | 1416  | 0.78  | 0.4369 |

## The GLIMMIX Procedure

## Solution for Random Effects

| Effect         | numb | Subject               | Std Err  |        | DF    | t Value | Pr >  t |
|----------------|------|-----------------------|----------|--------|-------|---------|---------|
|                |      |                       | Estimate | Pred   |       |         |         |
| NcoopUlag*numb | 5    | actor G13             | 0        | 0.5783 | 113.3 | 0.00    | 1.0000  |
| Intercept      |      | actor(actor_g) G14 G3 | -0.9228  | 0.5321 | 676.5 | -1.73   | 0.0833  |
| NcoopUlag*numb | 2    | actor G14             | 0        | 0.5783 | 113.3 | 0.00    | 1.0000  |
| NcoopUlag*numb | 3    | actor G14             | 0        | 0.5783 | 113.3 | 0.00    | 1.0000  |
| NcoopUlag*numb | 4    | actor G14             | -0.5359  | 0.3329 | 697.4 | -1.61   | 0.1079  |
| NcoopUlag*numb | 5    | actor G14             | 0        | 0.5783 | 113.3 | 0.00    | 1.0000  |
| Intercept      |      | actor(actor_g) G15 G5 | 1.1814   | 0.3898 | 1457  | 3.03    | 0.0025  |
| NcoopUlag*numb | 2    | actor G15             | 0        | 0.5783 | 113.3 | 0.00    | 1.0000  |
| NcoopUlag*numb | 3    | actor G15             | 0        | 0.5783 | 113.3 | 0.00    | 1.0000  |
| NcoopUlag*numb | 4    | actor G15             | -0.5293  | 0.1917 | 1621  | -2.76   | 0.0058  |
| NcoopUlag*numb | 5    | actor G15             | 0        | 0.5783 | 113.3 | 0.00    | 1.0000  |
| Intercept      |      | actor(actor_g) G16 G2 | 0.1112   | 0.3569 | 1359  | 0.31    | 0.7554  |
| NcoopUlag*numb | 2    | actor G16             | 0        | 0.5783 | 113.3 | 0.00    | 1.0000  |
| NcoopUlag*numb | 3    | actor G16             | 0        | 0.5783 | 113.3 | 0.00    | 1.0000  |

|                  |                       |          |        |       |       |        |
|------------------|-----------------------|----------|--------|-------|-------|--------|
| NcoopUlag*numb 4 | actor G16             | 0.3299   | 0.2187 | 1576  | 1.51  | 0.1317 |
| NcoopUlag*numb 5 | actor G16             | 0        | 0.5783 | 113.3 | 0.00  | 1.0000 |
| Intercept        | actor(actor_g) G17 G1 | 0.9668   | 0.2871 | 1443  | 3.37  | 0.0008 |
| NcoopUlag*numb 2 | actor G17             | 0        | 0.5783 | 113.3 | 0.00  | 1.0000 |
| NcoopUlag*numb 3 | actor G17             | 0        | 0.5783 | 113.3 | 0.00  | 1.0000 |
| NcoopUlag*numb 4 | actor G17             | -0.2317  | 0.2196 | 1915  | -1.06 | 0.2914 |
| NcoopUlag*numb 5 | actor G17             | 0        | 0.5783 | 113.3 | 0.00  | 1.0000 |
| Intercept        | actor(actor_g) G18 G1 | -1.2286  | 0.4764 | 849.9 | -2.58 | 0.0101 |
| NcoopUlag*numb 2 | actor G18             | 0        | 0.5783 | 113.3 | 0.00  | 1.0000 |
| NcoopUlag*numb 3 | actor G18             | 0        | 0.5783 | 113.3 | 0.00  | 1.0000 |
| NcoopUlag*numb 4 | actor G18             | -0.07478 | 0.3190 | 864   | -0.23 | 0.8147 |
| NcoopUlag*numb 5 | actor G18             | 0        | 0.5783 | 113.3 | 0.00  | 1.0000 |
| Intercept        | actor(actor_g) G19 G3 | 0.6252   | 0.3579 | 1403  | 1.75  | 0.0809 |
| NcoopUlag*numb 2 | actor G19             | 0        | 0.5783 | 113.3 | 0.00  | 1.0000 |
| NcoopUlag*numb 3 | actor G19             | 0        | 0.5783 | 113.3 | 0.00  | 1.0000 |
| NcoopUlag*numb 4 | actor G19             | 0.2813   | 0.2183 | 1572  | 1.29  | 0.1976 |
| NcoopUlag*numb 5 | actor G19             | 0        | 0.5783 | 113.3 | 0.00  | 1.0000 |
| Intercept        | actor(actor_g) G2 G3  | 0.5330   | 0.3637 | 1383  | 1.47  | 0.1430 |
| NcoopUlag*numb 2 | actor G2              | 0        | 0.5783 | 113.3 | 0.00  | 1.0000 |
| NcoopUlag*numb 3 | actor G2              | 0        | 0.5783 | 113.3 | 0.00  | 1.0000 |
| NcoopUlag*numb 4 | actor G2              | 0.4141   | 0.2262 | 1538  | 1.83  | 0.0673 |
| NcoopUlag*numb 5 | actor G2              | 0        | 0.5783 | 113.3 | 0.00  | 1.0000 |
| Intercept        | actor(actor_g) G20 G4 | 1.0357   | 0.3252 | 1603  | 3.19  | 0.0015 |

|                  |                      |         |        |       |       |        |
|------------------|----------------------|---------|--------|-------|-------|--------|
| NcoopUlag*numb 2 | actor G20            | 0       | 0.5783 | 113.3 | 0.00  | 1.0000 |
| NcoopUlag*numb 3 | actor G20            | 0       | 0.5783 | 113.3 | 0.00  | 1.0000 |
| NcoopUlag*numb 4 | actor G20            | -0.2838 | 0.2094 | 1937  | -1.36 | 0.1754 |
| NcoopUlag*numb 5 | actor G20            | 0       | 0.5783 | 113.3 | 0.00  | 1.0000 |
| Intercept        | actor(actor_g) G3 G4 | 0.9940  | 0.3300 | 1587  | 3.01  | 0.0026 |
| NcoopUlag*numb 2 | actor G3             | 0       | 0.5783 | 113.3 | 0.00  | 1.0000 |
| NcoopUlag*numb 3 | actor G3             | 0       | 0.5783 | 113.3 | 0.00  | 1.0000 |
| NcoopUlag*numb 4 | actor G3             | -0.4509 | 0.2132 | 1929  | -2.12 | 0.0345 |
| NcoopUlag*numb 5 | actor G3             | 0       | 0.5783 | 113.3 | 0.00  | 1.0000 |

## The GLIMMIX Procedure

## Solution for Random Effects

| Effect         | numb | Subject              | Std Err  |        | DF    | t Value | Pr >  t |
|----------------|------|----------------------|----------|--------|-------|---------|---------|
|                |      |                      | Estimate | Pred   |       |         |         |
| Intercept      |      | actor(actor_g) G4 G5 | -1.0607  | 0.5036 | 855.7 | -2.11   | 0.0355  |
| NcoopUlag*numb | 2    | actor G4             | 0        | 0.5783 | 113.3 | 0.00    | 1.0000  |
| NcoopUlag*numb | 3    | actor G4             | 0        | 0.5783 | 113.3 | 0.00    | 1.0000  |
| NcoopUlag*numb | 4    | actor G4             | 0.3680   | 0.2181 | 1092  | 1.69    | 0.0918  |
| NcoopUlag*numb | 5    | actor G4             | 0        | 0.5783 | 113.3 | 0.00    | 1.0000  |
| Intercept      |      | actor(actor_g) G5 G5 | 0.9826   | 0.3880 | 1473  | 2.53    | 0.0114  |
| NcoopUlag*numb | 2    | actor G5             | 0        | 0.5783 | 113.3 | 0.00    | 1.0000  |
| NcoopUlag*numb | 3    | actor G5             | 0        | 0.5783 | 113.3 | 0.00    | 1.0000  |
| NcoopUlag*numb | 4    | actor G5             | -0.1192  | 0.1913 | 1610  | -0.62   | 0.5334  |
| NcoopUlag*numb | 5    | actor G5             | 0        | 0.5783 | 113.3 | 0.00    | 1.0000  |
| Intercept      |      | actor(actor_g) G6 G2 | 0.2930   | 0.3445 | 1391  | 0.85    | 0.3951  |
| NcoopUlag*numb | 2    | actor G6             | 0        | 0.5783 | 113.3 | 0.00    | 1.0000  |
| NcoopUlag*numb | 3    | actor G6             | 0        | 0.5783 | 113.3 | 0.00    | 1.0000  |
| NcoopUlag*numb | 4    | actor G6             | 0.03171  | 0.2055 | 1625  | 0.15    | 0.8774  |

|                  |                       |          |        |       |       |        |
|------------------|-----------------------|----------|--------|-------|-------|--------|
| NcoopUlag*numb 5 | actor G6              | 0        | 0.5783 | 113.3 | 0.00  | 1.0000 |
| Intercept        | actor(actor_g) G7 G5  | 0.6713   | 0.4361 | 1136  | 1.54  | 0.1240 |
| NcoopUlag*numb 2 | actor G7              | 0        | 0.5783 | 113.3 | 0.00  | 1.0000 |
| NcoopUlag*numb 3 | actor G7              | 0        | 0.5783 | 113.3 | 0.00  | 1.0000 |
| NcoopUlag*numb 4 | actor G7              | 0.8013   | 0.2738 | 1131  | 2.93  | 0.0035 |
| NcoopUlag*numb 5 | actor G7              | 0        | 0.5783 | 113.3 | 0.00  | 1.0000 |
| Intercept        | actor(actor_g) G8 G2  | -0.3186  | 0.4104 | 1144  | -0.78 | 0.4377 |
| NcoopUlag*numb 2 | actor G8              | 0        | 0.5783 | 113.3 | 0.00  | 1.0000 |
| NcoopUlag*numb 3 | actor G8              | 0        | 0.5783 | 113.3 | 0.00  | 1.0000 |
| NcoopUlag*numb 4 | actor G8              | -0.2999  | 0.2422 | 1361  | -1.24 | 0.2158 |
| NcoopUlag*numb 5 | actor G8              | 0        | 0.5783 | 113.3 | 0.00  | 1.0000 |
| Intercept        | actor(actor_g) G9 G3  | 0.2609   | 0.3803 | 1295  | 0.69  | 0.4929 |
| NcoopUlag*numb 2 | actor G9              | 0        | 0.5783 | 113.3 | 0.00  | 1.0000 |
| NcoopUlag*numb 3 | actor G9              | 0        | 0.5783 | 113.3 | 0.00  | 1.0000 |
| NcoopUlag*numb 4 | actor G9              | -0.04296 | 0.2130 | 1485  | -0.20 | 0.8402 |
| NcoopUlag*numb 5 | actor G9              | 0        | 0.5783 | 113.3 | 0.00  | 1.0000 |
| Intercept        | actor(actor_g) H1 H4  | 0.9956   | 0.3261 | 1512  | 3.05  | 0.0023 |
| NcoopUlag*numb 2 | actor H1              | 0        | 0.5783 | 113.3 | 0.00  | 1.0000 |
| NcoopUlag*numb 3 | actor H1              | 0        | 0.5783 | 113.3 | 0.00  | 1.0000 |
| NcoopUlag*numb 4 | actor H1              | -0.05247 | 0.2107 | 1764  | -0.25 | 0.8033 |
| NcoopUlag*numb 5 | actor H1              | 0        | 0.5783 | 113.3 | 0.00  | 1.0000 |
| Intercept        | actor(actor_g) H10 H4 | -1.7933  | 0.6297 | 439.6 | -2.85 | 0.0046 |
| NcoopUlag*numb 2 | actor H10             | 0        | 0.5783 | 113.3 | 0.00  | 1.0000 |

|                  |                       |         |        |       |       |        |
|------------------|-----------------------|---------|--------|-------|-------|--------|
| NcoopUlag*numb 3 | actor H10             | 0       | 0.5783 | 113.3 | 0.00  | 1.0000 |
| NcoopUlag*numb 4 | actor H10             | -0.7091 | 0.4398 | 311.4 | -1.61 | 0.1078 |
| NcoopUlag*numb 5 | actor H10             | 0       | 0.5783 | 113.3 | 0.00  | 1.0000 |
| Intercept        | actor(actor_g) H11 H3 | 0.4313  | 0.3265 | 1311  | 1.32  | 0.1867 |
| NcoopUlag*numb 2 | actor H11             | 0       | 0.5783 | 113.3 | 0.00  | 1.0000 |
| NcoopUlag*numb 3 | actor H11             | 0       | 0.5783 | 113.3 | 0.00  | 1.0000 |
| NcoopUlag*numb 4 | actor H11             | 0.6345  | 0.2510 | 1392  | 2.53  | 0.0116 |
| NcoopUlag*numb 5 | actor H11             | 0       | 0.5783 | 113.3 | 0.00  | 1.0000 |
| Intercept        | actor(actor_g) H12 H3 | -0.4964 | 0.3849 | 1159  | -1.29 | 0.1974 |

## The GLIMMIX Procedure

## Solution for Random Effects

| Effect         | numb | Subject               | Std Err  |        | DF    | t Value | Pr >  t |
|----------------|------|-----------------------|----------|--------|-------|---------|---------|
|                |      |                       | Estimate | Pred   |       |         |         |
| NcoopUlag*numb | 2    | actor H12             | 0        | 0.5783 | 113.3 | 0.00    | 1.0000  |
| NcoopUlag*numb | 3    | actor H12             | 0        | 0.5783 | 113.3 | 0.00    | 1.0000  |
| NcoopUlag*numb | 4    | actor H12             | 0.4783   | 0.2390 | 1315  | 2.00    | 0.0456  |
| NcoopUlag*numb | 5    | actor H12             | 0        | 0.5783 | 113.3 | 0.00    | 1.0000  |
| Intercept      |      | actor(actor_g) H13 H2 | -1.3387  | 0.4769 | 834.5 | -2.81   | 0.0051  |
| NcoopUlag*numb | 2    | actor H13             | 0        | 0.5783 | 113.3 | 0.00    | 1.0000  |
| NcoopUlag*numb | 3    | actor H13             | 0        | 0.5783 | 113.3 | 0.00    | 1.0000  |
| NcoopUlag*numb | 4    | actor H13             | -0.07193 | 0.3524 | 668.3 | -0.20   | 0.8383  |
| NcoopUlag*numb | 5    | actor H13             | 0        | 0.5783 | 113.3 | 0.00    | 1.0000  |
| Intercept      |      | actor(actor_g) H14 H2 | 0.6547   | 0.2890 | 1388  | 2.27    | 0.0237  |
| NcoopUlag*numb | 2    | actor H14             | 0        | 0.5783 | 113.3 | 0.00    | 1.0000  |
| NcoopUlag*numb | 3    | actor H14             | 0        | 0.5783 | 113.3 | 0.00    | 1.0000  |
| NcoopUlag*numb | 4    | actor H14             | 0.04458  | 0.2411 | 1723  | 0.18    | 0.8533  |
| NcoopUlag*numb | 5    | actor H14             | 0        | 0.5783 | 113.3 | 0.00    | 1.0000  |



|                  |                       |         |        |       |       |        |
|------------------|-----------------------|---------|--------|-------|-------|--------|
| Intercept        | actor(actor_g) H15 H5 | -1.5270 | 0.5102 | 651.5 | -2.99 | 0.0029 |
| NcoopUlag*numb 2 | actor H15             | 0       | 0.5783 | 113.3 | 0.00  | 1.0000 |
| NcoopUlag*numb 3 | actor H15             | 0       | 0.5783 | 113.3 | 0.00  | 1.0000 |
| NcoopUlag*numb 4 | actor H15             | 0.4622  | 0.3461 | 611.2 | 1.34  | 0.1823 |
| NcoopUlag*numb 5 | actor H15             | 0       | 0.5783 | 113.3 | 0.00  | 1.0000 |
| Intercept        | actor(actor_g) H16 H1 | 0.4103  | 0.3564 | 1416  | 1.15  | 0.2499 |
| NcoopUlag*numb 2 | actor H16             | 0       | 0.5783 | 113.3 | 0.00  | 1.0000 |
| NcoopUlag*numb 3 | actor H16             | 0       | 0.5783 | 113.3 | 0.00  | 1.0000 |
| NcoopUlag*numb 4 | actor H16             | 0.2536  | 0.2166 | 1624  | 1.17  | 0.2418 |
| NcoopUlag*numb 5 | actor H16             | 0       | 0.5783 | 113.3 | 0.00  | 1.0000 |
| Intercept        | actor(actor_g) H17 H4 | 0.6092  | 0.3465 | 1448  | 1.76  | 0.0789 |
| NcoopUlag*numb 2 | actor H17             | 0       | 0.5783 | 113.3 | 0.00  | 1.0000 |
| NcoopUlag*numb 3 | actor H17             | 0       | 0.5783 | 113.3 | 0.00  | 1.0000 |
| NcoopUlag*numb 4 | actor H17             | 0.5352  | 0.2455 | 1539  | 2.18  | 0.0294 |
| NcoopUlag*numb 5 | actor H17             | 0       | 0.5783 | 113.3 | 0.00  | 1.0000 |
| Intercept        | actor(actor_g) H18 H3 | -1.6873 | 0.5129 | 733.7 | -3.29 | 0.0011 |
| NcoopUlag*numb 2 | actor H18             | 0       | 0.5783 | 113.3 | 0.00  | 1.0000 |
| NcoopUlag*numb 3 | actor H18             | 0       | 0.5783 | 113.3 | 0.00  | 1.0000 |
| NcoopUlag*numb 4 | actor H18             | 0.3221  | 0.2684 | 987.4 | 1.20  | 0.2304 |
| NcoopUlag*numb 5 | actor H18             | 0       | 0.5783 | 113.3 | 0.00  | 1.0000 |
| Intercept        | actor(actor_g) H19 H5 | 2.8770  | 0.4750 | 609   | 6.06  | <.0001 |
| NcoopUlag*numb 2 | actor H19             | 0       | 0.5783 | 113.3 | 0.00  | 1.0000 |
| NcoopUlag*numb 3 | actor H19             | 0       | 0.5783 | 113.3 | 0.00  | 1.0000 |

|                  |                       |         |        |       |       |        |
|------------------|-----------------------|---------|--------|-------|-------|--------|
| NcoopUlag*numb 4 | actor H19             | 0.04438 | 0.4010 | 409.3 | 0.11  | 0.9119 |
| NcoopUlag*numb 5 | actor H19             | 0       | 0.5783 | 113.3 | 0.00  | 1.0000 |
| Intercept        | actor(actor_g) H2 H3  | 0.1989  | 0.3375 | 1292  | 0.59  | 0.5558 |
| NcoopUlag*numb 2 | actor H2              | 0       | 0.5783 | 113.3 | 0.00  | 1.0000 |
| NcoopUlag*numb 3 | actor H2              | 0       | 0.5783 | 113.3 | 0.00  | 1.0000 |
| NcoopUlag*numb 4 | actor H2              | -0.1929 | 0.2165 | 1537  | -0.89 | 0.3732 |
| NcoopUlag*numb 5 | actor H2              | 0       | 0.5783 | 113.3 | 0.00  | 1.0000 |
| Intercept        | actor(actor_g) H20 H1 | 0.3436  | 0.3621 | 1397  | 0.95  | 0.3428 |
| NcoopUlag*numb 2 | actor H20             | 0       | 0.5783 | 113.3 | 0.00  | 1.0000 |

## The GLIMMIX Procedure

## Solution for Random Effects

| Effect         | numb | Subject              | Std Err  |        |       |         |         |
|----------------|------|----------------------|----------|--------|-------|---------|---------|
|                |      |                      | Estimate | Pred   | DF    | t Value | Pr >  t |
| NcoopUlag*numb | 3    | actor H20            | 0        | 0.5783 | 113.3 | 0.00    | 1.0000  |
| NcoopUlag*numb | 4    | actor H20            | 0.4481   | 0.2297 | 1561  | 1.95    | 0.0513  |
| NcoopUlag*numb | 5    | actor H20            | 0        | 0.5783 | 113.3 | 0.00    | 1.0000  |
| Intercept      |      | actor(actor_g) H3 H2 | -0.5584  | 0.4009 | 1144  | -1.39   | 0.1640  |
| NcoopUlag*numb | 2    | actor H3             | 0        | 0.5783 | 113.3 | 0.00    | 1.0000  |
| NcoopUlag*numb | 3    | actor H3             | 0        | 0.5783 | 113.3 | 0.00    | 1.0000  |
| NcoopUlag*numb | 4    | actor H3             | -0.8446  | 0.3894 | 503.9 | -2.17   | 0.0306  |
| NcoopUlag*numb | 5    | actor H3             | 0        | 0.5783 | 113.3 | 0.00    | 1.0000  |
| Intercept      |      | actor(actor_g) H4 H1 | -1.0634  | 0.5220 | 720.4 | -2.04   | 0.0420  |
| NcoopUlag*numb | 2    | actor H4             | 0        | 0.5783 | 113.3 | 0.00    | 1.0000  |
| NcoopUlag*numb | 3    | actor H4             | 0        | 0.5783 | 113.3 | 0.00    | 1.0000  |
| NcoopUlag*numb | 4    | actor H4             | -0.2938  | 0.3004 | 872.2 | -0.98   | 0.3283  |
| NcoopUlag*numb | 5    | actor H4             | 0        | 0.5783 | 113.3 | 0.00    | 1.0000  |
| Intercept      |      | actor(actor_g) H5 H1 | 0.8697   | 0.3382 | 1477  | 2.57    | 0.0102  |

|                |   |                      |          |        |       |       |        |
|----------------|---|----------------------|----------|--------|-------|-------|--------|
| NcoopUlag*numb | 2 | actor H5             | 0        | 0.5783 | 113.3 | 0.00  | 1.0000 |
| NcoopUlag*numb | 3 | actor H5             | 0        | 0.5783 | 113.3 | 0.00  | 1.0000 |
| NcoopUlag*numb | 4 | actor H5             | -0.3225  | 0.2006 | 1710  | -1.61 | 0.1080 |
| NcoopUlag*numb | 5 | actor H5             | 0        | 0.5783 | 113.3 | 0.00  | 1.0000 |
| Intercept      |   | actor(actor_g) H6 H5 | -0.6423  | 0.4926 | 675.3 | -1.30 | 0.1927 |
| NcoopUlag*numb | 2 | actor H6             | 0        | 0.5783 | 113.3 | 0.00  | 1.0000 |
| NcoopUlag*numb | 3 | actor H6             | 0        | 0.5783 | 113.3 | 0.00  | 1.0000 |
| NcoopUlag*numb | 4 | actor H6             | -0.2262  | 0.3576 | 576.2 | -0.63 | 0.5272 |
| NcoopUlag*numb | 5 | actor H6             | 0        | 0.5783 | 113.3 | 0.00  | 1.0000 |
| Intercept      |   | actor(actor_g) H7 H2 | -0.2489  | 0.3452 | 1298  | -0.72 | 0.4709 |
| NcoopUlag*numb | 2 | actor H7             | 0        | 0.5783 | 113.3 | 0.00  | 1.0000 |
| NcoopUlag*numb | 3 | actor H7             | 0        | 0.5783 | 113.3 | 0.00  | 1.0000 |
| NcoopUlag*numb | 4 | actor H7             | 0.4916   | 0.2632 | 1424  | 1.87  | 0.0620 |
| NcoopUlag*numb | 5 | actor H7             | 0        | 0.5783 | 113.3 | 0.00  | 1.0000 |
| Intercept      |   | actor(actor_g) H8 H5 | -1.7340  | 0.6132 | 416.9 | -2.83 | 0.0049 |
| NcoopUlag*numb | 2 | actor H8             | 0        | 0.5783 | 113.3 | 0.00  | 1.0000 |
| NcoopUlag*numb | 3 | actor H8             | 0        | 0.5783 | 113.3 | 0.00  | 1.0000 |
| NcoopUlag*numb | 4 | actor H8             | -0.3923  | 0.4501 | 275.2 | -0.87 | 0.3842 |
| NcoopUlag*numb | 5 | actor H8             | 0        | 0.5783 | 113.3 | 0.00  | 1.0000 |
| Intercept      |   | actor(actor_g) H9 H4 | -0.08372 | 0.3929 | 1253  | -0.21 | 0.8313 |
| NcoopUlag*numb | 2 | actor H9             | 0        | 0.5783 | 113.3 | 0.00  | 1.0000 |
| NcoopUlag*numb | 3 | actor H9             | 0        | 0.5783 | 113.3 | 0.00  | 1.0000 |
| NcoopUlag*numb | 4 | actor H9             | -0.09504 | 0.2293 | 1508  | -0.41 | 0.6786 |

|                  |                       |          |        |       |       |        |
|------------------|-----------------------|----------|--------|-------|-------|--------|
| NcoopUlag*numb 5 | actor H9              | 0        | 0.5783 | 113.3 | 0.00  | 1.0000 |
| Intercept        | actor(actor_g) I1 I2  | -0.1631  | 0.4260 | 1345  | -0.38 | 0.7019 |
| NcoopUlag*numb 2 | actor I1              | 0        | 0.5783 | 113.3 | 0.00  | 1.0000 |
| NcoopUlag*numb 3 | actor I1              | 0        | 0.5783 | 113.3 | 0.00  | 1.0000 |
| NcoopUlag*numb 4 | actor I1              | 0        | 0.5783 | 113.3 | 0.00  | 1.0000 |
| NcoopUlag*numb 5 | actor I1              | 0.004175 | 0.1906 | 1488  | 0.02  | 0.9825 |
| Intercept        | actor(actor_g) I10 I3 | -1.4847  | 0.5814 | 563.7 | -2.55 | 0.0109 |
| NcoopUlag*numb 2 | actor I10             | 0        | 0.5783 | 113.3 | 0.00  | 1.0000 |
| NcoopUlag*numb 3 | actor I10             | 0        | 0.5783 | 113.3 | 0.00  | 1.0000 |

## The GLIMMIX Procedure

## Solution for Random Effects

| Effect         | numb | Subject               | Std Err  |        |       |         |         |
|----------------|------|-----------------------|----------|--------|-------|---------|---------|
|                |      |                       | Estimate | Pred   | DF    | t Value | Pr >  t |
| NcoopUlag*numb | 4    | actor I10             | 0        | 0.5783 | 113.3 | 0.00    | 1.0000  |
| NcoopUlag*numb | 5    | actor I10             | -0.3619  | 0.3320 | 714.5 | -1.09   | 0.2761  |
| Intercept      |      | actor(actor_g) I11 I3 | -1.9392  | 0.5486 | 684   | -3.54   | 0.0004  |
| NcoopUlag*numb | 2    | actor I11             | 0        | 0.5783 | 113.3 | 0.00    | 1.0000  |
| NcoopUlag*numb | 3    | actor I11             | 0        | 0.5783 | 113.3 | 0.00    | 1.0000  |
| NcoopUlag*numb | 4    | actor I11             | 0        | 0.5783 | 113.3 | 0.00    | 1.0000  |
| NcoopUlag*numb | 5    | actor I11             | 0.4288   | 0.2286 | 1056  | 1.88    | 0.0610  |
| Intercept      |      | actor(actor_g) I12 I3 | 0.2619   | 0.3723 | 1528  | 0.70    | 0.4820  |
| NcoopUlag*numb | 2    | actor I12             | 0        | 0.5783 | 113.3 | 0.00    | 1.0000  |
| NcoopUlag*numb | 3    | actor I12             | 0        | 0.5783 | 113.3 | 0.00    | 1.0000  |
| NcoopUlag*numb | 4    | actor I12             | 0        | 0.5783 | 113.3 | 0.00    | 1.0000  |
| NcoopUlag*numb | 5    | actor I12             | -0.1470  | 0.1947 | 1693  | -0.76   | 0.4502  |
| Intercept      |      | actor(actor_g) I13 I1 | 0.3076   | 0.3653 | 1557  | 0.84    | 0.3998  |
| NcoopUlag*numb | 2    | actor I13             | 0        | 0.5783 | 113.3 | 0.00    | 1.0000  |

|                  |                       |          |        |       |       |        |
|------------------|-----------------------|----------|--------|-------|-------|--------|
| NcoopUlag*numb 3 | actor I13             | 0        | 0.5783 | 113.3 | 0.00  | 1.0000 |
| NcoopUlag*numb 4 | actor I13             | 0        | 0.5783 | 113.3 | 0.00  | 1.0000 |
| NcoopUlag*numb 5 | actor I13             | 0.3725   | 0.1894 | 1606  | 1.97  | 0.0494 |
| Intercept        | actor(actor_g) I14 I1 | 0.4861   | 0.3534 | 1502  | 1.38  | 0.1692 |
| NcoopUlag*numb 2 | actor I14             | 0        | 0.5783 | 113.3 | 0.00  | 1.0000 |
| NcoopUlag*numb 3 | actor I14             | 0        | 0.5783 | 113.3 | 0.00  | 1.0000 |
| NcoopUlag*numb 4 | actor I14             | 0        | 0.5783 | 113.3 | 0.00  | 1.0000 |
| NcoopUlag*numb 5 | actor I14             | -0.08016 | 0.1693 | 1422  | -0.47 | 0.6360 |
| Intercept        | actor(actor_g) I15 I1 | 1.2948   | 0.3325 | 1518  | 3.89  | 0.0001 |
| NcoopUlag*numb 2 | actor I15             | 0        | 0.5783 | 113.3 | 0.00  | 1.0000 |
| NcoopUlag*numb 3 | actor I15             | 0        | 0.5783 | 113.3 | 0.00  | 1.0000 |
| NcoopUlag*numb 4 | actor I15             | 0        | 0.5783 | 113.3 | 0.00  | 1.0000 |
| NcoopUlag*numb 5 | actor I15             | -0.3803  | 0.1618 | 1338  | -2.35 | 0.0189 |
| Intercept        | actor(actor_g) I2 I2  | 1.5548   | 0.4873 | 872.4 | 3.19  | 0.0015 |
| NcoopUlag*numb 2 | actor I2              | 0        | 0.5783 | 113.3 | 0.00  | 1.0000 |
| NcoopUlag*numb 3 | actor I2              | 0        | 0.5783 | 113.3 | 0.00  | 1.0000 |
| NcoopUlag*numb 4 | actor I2              | 0        | 0.5783 | 113.3 | 0.00  | 1.0000 |
| NcoopUlag*numb 5 | actor I2              | 0.7575   | 0.3146 | 808.6 | 2.41  | 0.0163 |
| Intercept        | actor(actor_g) I3 I1  | -0.8475  | 0.5389 | 686.8 | -1.57 | 0.1163 |
| NcoopUlag*numb 2 | actor I3              | 0        | 0.5783 | 113.3 | 0.00  | 1.0000 |
| NcoopUlag*numb 3 | actor I3              | 0        | 0.5783 | 113.3 | 0.00  | 1.0000 |
| NcoopUlag*numb 4 | actor I3              | 0        | 0.5783 | 113.3 | 0.00  | 1.0000 |
| NcoopUlag*numb 5 | actor I3              | -0.5645  | 0.3229 | 770.1 | -1.75 | 0.0808 |

|                  |                      |         |        |       |       |        |
|------------------|----------------------|---------|--------|-------|-------|--------|
| Intercept        | actor(actor_g) I4 I1 | -0.4783 | 0.4616 | 1052  | -1.04 | 0.3004 |
| NcoopUlag*numb 2 | actor I4             | 0       | 0.5783 | 113.3 | 0.00  | 1.0000 |
| NcoopUlag*numb 3 | actor I4             | 0       | 0.5783 | 113.3 | 0.00  | 1.0000 |
| NcoopUlag*numb 4 | actor I4             | 0       | 0.5783 | 113.3 | 0.00  | 1.0000 |
| NcoopUlag*numb 5 | actor I4             | -0.2909 | 0.2336 | 1390  | -1.25 | 0.2133 |
| Intercept        | actor(actor_g) I5 I2 | 1.0080  | 0.3736 | 1664  | 2.70  | 0.0070 |
| NcoopUlag*numb 2 | actor I5             | 0       | 0.5783 | 113.3 | 0.00  | 1.0000 |
| NcoopUlag*numb 3 | actor I5             | 0       | 0.5783 | 113.3 | 0.00  | 1.0000 |
| NcoopUlag*numb 4 | actor I5             | 0       | 0.5783 | 113.3 | 0.00  | 1.0000 |



## The GLIMMIX Procedure

## Solution for Random Effects

| Effect         | numb | Subject              | Std Err  |        | DF    | t Value | Pr >  t |
|----------------|------|----------------------|----------|--------|-------|---------|---------|
|                |      |                      | Estimate | Pred   |       |         |         |
| NcoopUlag*numb | 5    | actor I5             | -0.3075  | 0.1750 | 1537  | -1.76   | 0.0791  |
| Intercept      |      | actor(actor_g) I6 I2 | 0.8144   | 0.3756 | 1630  | 2.17    | 0.0303  |
| NcoopUlag*numb | 2    | actor I6             | 0        | 0.5783 | 113.3 | 0.00    | 1.0000  |
| NcoopUlag*numb | 3    | actor I6             | 0        | 0.5783 | 113.3 | 0.00    | 1.0000  |
| NcoopUlag*numb | 4    | actor I6             | 0        | 0.5783 | 113.3 | 0.00    | 1.0000  |
| NcoopUlag*numb | 5    | actor I6             | -0.2255  | 0.1786 | 1561  | -1.26   | 0.2068  |
| Intercept      |      | actor(actor_g) I7 I3 | -0.2119  | 0.3888 | 1453  | -0.54   | 0.5859  |
| NcoopUlag*numb | 2    | actor I7             | 0        | 0.5783 | 113.3 | 0.00    | 1.0000  |
| NcoopUlag*numb | 3    | actor I7             | 0        | 0.5783 | 113.3 | 0.00    | 1.0000  |
| NcoopUlag*numb | 4    | actor I7             | 0        | 0.5783 | 113.3 | 0.00    | 1.0000  |
| NcoopUlag*numb | 5    | actor I7             | 0.7312   | 0.2136 | 1603  | 3.42    | 0.0006  |
| Intercept      |      | actor(actor_g) I8 I3 | 1.3018   | 0.3281 | 1595  | 3.97    | <.0001  |
| NcoopUlag*numb | 2    | actor I8             | 0        | 0.5783 | 113.3 | 0.00    | 1.0000  |
| NcoopUlag*numb | 3    | actor I8             | 0        | 0.5783 | 113.3 | 0.00    | 1.0000  |

|                  |                       |          |        |       |       |        |
|------------------|-----------------------|----------|--------|-------|-------|--------|
| NcoopUlag*numb 4 | actor I8              | 0        | 0.5783 | 113.3 | 0.00  | 1.0000 |
| NcoopUlag*numb 5 | actor I8              | -0.4913  | 0.1739 | 1567  | -2.83 | 0.0048 |
| Intercept        | actor(actor_g) I9 I2  | -1.1259  | 0.6107 | 482.1 | -1.84 | 0.0659 |
| NcoopUlag*numb 2 | actor I9              | 0        | 0.5783 | 113.3 | 0.00  | 1.0000 |
| NcoopUlag*numb 3 | actor I9              | 0        | 0.5783 | 113.3 | 0.00  | 1.0000 |
| NcoopUlag*numb 4 | actor I9              | 0        | 0.5783 | 113.3 | 0.00  | 1.0000 |
| NcoopUlag*numb 5 | actor I9              | -0.6339  | 0.3567 | 561.9 | -1.78 | 0.0761 |
| Intercept        | actor(actor_g) J1 J1  | 0.09636  | 0.3986 | 1350  | 0.24  | 0.8090 |
| NcoopUlag*numb 2 | actor J1              | 0        | 0.5783 | 113.3 | 0.00  | 1.0000 |
| NcoopUlag*numb 3 | actor J1              | 0        | 0.5783 | 113.3 | 0.00  | 1.0000 |
| NcoopUlag*numb 4 | actor J1              | 0        | 0.5783 | 113.3 | 0.00  | 1.0000 |
| NcoopUlag*numb 5 | actor J1              | 0.3004   | 0.1849 | 1389  | 1.62  | 0.1044 |
| Intercept        | actor(actor_g) J10 J2 | -0.7580  | 0.5220 | 781   | -1.45 | 0.1469 |
| NcoopUlag*numb 2 | actor J10             | 0        | 0.5783 | 113.3 | 0.00  | 1.0000 |
| NcoopUlag*numb 3 | actor J10             | 0        | 0.5783 | 113.3 | 0.00  | 1.0000 |
| NcoopUlag*numb 4 | actor J10             | 0        | 0.5783 | 113.3 | 0.00  | 1.0000 |
| NcoopUlag*numb 5 | actor J10             | -0.2973  | 0.2465 | 1099  | -1.21 | 0.2281 |
| Intercept        | actor(actor_g) J11 J2 | -0.3101  | 0.4227 | 1317  | -0.73 | 0.4633 |
| NcoopUlag*numb 2 | actor J11             | 0        | 0.5783 | 113.3 | 0.00  | 1.0000 |
| NcoopUlag*numb 3 | actor J11             | 0        | 0.5783 | 113.3 | 0.00  | 1.0000 |
| NcoopUlag*numb 4 | actor J11             | 0        | 0.5783 | 113.3 | 0.00  | 1.0000 |
| NcoopUlag*numb 5 | actor J11             | 0.07127  | 0.1715 | 1314  | 0.42  | 0.6778 |
| Intercept        | actor(actor_g) J12 J1 | -0.04494 | 0.4135 | 1286  | -0.11 | 0.9135 |

|                  |                       |         |        |       |       |        |
|------------------|-----------------------|---------|--------|-------|-------|--------|
| NcoopUlag*numb 2 | actor J12             | 0       | 0.5783 | 113.3 | 0.00  | 1.0000 |
| NcoopUlag*numb 3 | actor J12             | 0       | 0.5783 | 113.3 | 0.00  | 1.0000 |
| NcoopUlag*numb 4 | actor J12             | 0       | 0.5783 | 113.3 | 0.00  | 1.0000 |
| NcoopUlag*numb 5 | actor J12             | 0.02662 | 0.1823 | 1350  | 0.15  | 0.8840 |
| Intercept        | actor(actor_g) J13 J3 | -1.1677 | 0.5024 | 907.2 | -2.32 | 0.0203 |
| NcoopUlag*numb 2 | actor J13             | 0       | 0.5783 | 113.3 | 0.00  | 1.0000 |
| NcoopUlag*numb 3 | actor J13             | 0       | 0.5783 | 113.3 | 0.00  | 1.0000 |
| NcoopUlag*numb 4 | actor J13             | 0       | 0.5783 | 113.3 | 0.00  | 1.0000 |
| NcoopUlag*numb 5 | actor J13             | 0.1759  | 0.1999 | 1223  | 0.88  | 0.3791 |

## The GLIMMIX Procedure

## Solution for Random Effects

| Effect         | numb | Subject               | Std Err  |        | DF    | t Value | Pr >  t |
|----------------|------|-----------------------|----------|--------|-------|---------|---------|
|                |      |                       | Estimate | Pred   |       |         |         |
| Intercept      |      | actor(actor_g) J14 J3 | 1.2103   | 0.3567 | 1727  | 3.39    | 0.0007  |
| NcoopUlag*numb | 2    | actor J14             | 0        | 0.5783 | 113.3 | 0.00    | 1.0000  |
| NcoopUlag*numb | 3    | actor J14             | 0        | 0.5783 | 113.3 | 0.00    | 1.0000  |
| NcoopUlag*numb | 4    | actor J14             | 0        | 0.5783 | 113.3 | 0.00    | 1.0000  |
| NcoopUlag*numb | 5    | actor J14             | -0.09448 | 0.1570 | 1308  | -0.60   | 0.5473  |
| Intercept      |      | actor(actor_g) J15 J3 | 1.5869   | 0.3468 | 1732  | 4.58    | <.0001  |
| NcoopUlag*numb | 2    | actor J15             | 0        | 0.5783 | 113.3 | 0.00    | 1.0000  |
| NcoopUlag*numb | 3    | actor J15             | 0        | 0.5783 | 113.3 | 0.00    | 1.0000  |
| NcoopUlag*numb | 4    | actor J15             | 0        | 0.5783 | 113.3 | 0.00    | 1.0000  |
| NcoopUlag*numb | 5    | actor J15             | -0.3656  | 0.1595 | 1370  | -2.29   | 0.0221  |
| Intercept      |      | actor(actor_g) J2 J3  | -0.1791  | 0.4006 | 1489  | -0.45   | 0.6549  |
| NcoopUlag*numb | 2    | actor J2              | 0        | 0.5783 | 113.3 | 0.00    | 1.0000  |
| NcoopUlag*numb | 3    | actor J2              | 0        | 0.5783 | 113.3 | 0.00    | 1.0000  |
| NcoopUlag*numb | 4    | actor J2              | 0        | 0.5783 | 113.3 | 0.00    | 1.0000  |

|                  |                      |         |        |       |       |        |
|------------------|----------------------|---------|--------|-------|-------|--------|
| NcoopUlag*numb 5 | actor J2             | 0.3296  | 0.1707 | 1374  | 1.93  | 0.0536 |
| Intercept        | actor(actor_g) J3 J3 | 0.3333  | 0.3965 | 1534  | 0.84  | 0.4007 |
| NcoopUlag*numb 2 | actor J3             | 0       | 0.5783 | 113.3 | 0.00  | 1.0000 |
| NcoopUlag*numb 3 | actor J3             | 0       | 0.5783 | 113.3 | 0.00  | 1.0000 |
| NcoopUlag*numb 4 | actor J3             | 0       | 0.5783 | 113.3 | 0.00  | 1.0000 |
| NcoopUlag*numb 5 | actor J3             | -0.3250 | 0.1801 | 1562  | -1.80 | 0.0713 |
| Intercept        | actor(actor_g) J4 J2 | 1.3277  | 0.3554 | 1644  | 3.74  | 0.0002 |
| NcoopUlag*numb 2 | actor J4             | 0       | 0.5783 | 113.3 | 0.00  | 1.0000 |
| NcoopUlag*numb 3 | actor J4             | 0       | 0.5783 | 113.3 | 0.00  | 1.0000 |
| NcoopUlag*numb 4 | actor J4             | 0       | 0.5783 | 113.3 | 0.00  | 1.0000 |
| NcoopUlag*numb 5 | actor J4             | -0.4109 | 0.1586 | 1307  | -2.59 | 0.0097 |
| Intercept        | actor(actor_g) J5 J2 | -0.5380 | 0.4293 | 1236  | -1.25 | 0.2104 |
| NcoopUlag*numb 2 | actor J5             | 0       | 0.5783 | 113.3 | 0.00  | 1.0000 |
| NcoopUlag*numb 3 | actor J5             | 0       | 0.5783 | 113.3 | 0.00  | 1.0000 |
| NcoopUlag*numb 4 | actor J5             | 0       | 0.5783 | 113.3 | 0.00  | 1.0000 |
| NcoopUlag*numb 5 | actor J5             | 0.3572  | 0.1774 | 1270  | 2.01  | 0.0442 |
| Intercept        | actor(actor_g) J6 J1 | 1.3731  | 0.3620 | 1482  | 3.79  | 0.0002 |
| NcoopUlag*numb 2 | actor J6             | 0       | 0.5783 | 113.3 | 0.00  | 1.0000 |
| NcoopUlag*numb 3 | actor J6             | 0       | 0.5783 | 113.3 | 0.00  | 1.0000 |
| NcoopUlag*numb 4 | actor J6             | 0       | 0.5783 | 113.3 | 0.00  | 1.0000 |
| NcoopUlag*numb 5 | actor J6             | -0.3536 | 0.1645 | 1288  | -2.15 | 0.0317 |
| Intercept        | actor(actor_g) J7 J1 | 0.2784  | 0.3937 | 1316  | 0.71  | 0.4796 |
| NcoopUlag*numb 2 | actor J7             | 0       | 0.5783 | 113.3 | 0.00  | 1.0000 |

|                  |                      |          |        |       |       |        |
|------------------|----------------------|----------|--------|-------|-------|--------|
| NcoopUlag*numb 3 | actor J7             | 0        | 0.5783 | 113.3 | 0.00  | 1.0000 |
| NcoopUlag*numb 4 | actor J7             | 0        | 0.5783 | 113.3 | 0.00  | 1.0000 |
| NcoopUlag*numb 5 | actor J7             | -0.04577 | 0.1775 | 1320  | -0.26 | 0.7966 |
| Intercept        | actor(actor_g) J8 J1 | 0.2204   | 0.3919 | 1397  | 0.56  | 0.5740 |
| NcoopUlag*numb 2 | actor J8             | 0        | 0.5783 | 113.3 | 0.00  | 1.0000 |
| NcoopUlag*numb 3 | actor J8             | 0        | 0.5783 | 113.3 | 0.00  | 1.0000 |
| NcoopUlag*numb 4 | actor J8             | 0        | 0.5783 | 113.3 | 0.00  | 1.0000 |
| NcoopUlag*numb 5 | actor J8             | 0.05720  | 0.1689 | 1299  | 0.34  | 0.7348 |
| Intercept        | actor(actor_g) J9 J2 | 0.3877   | 0.4038 | 1331  | 0.96  | 0.3371 |

## The GLIMMIX Procedure

## Solution for Random Effects

| Effect         | numb | Subject               | Std Err  |        | DF    | t Value | Pr >  t |
|----------------|------|-----------------------|----------|--------|-------|---------|---------|
|                |      |                       | Estimate | Pred   |       |         |         |
| NcoopUlag*numb | 2    | actor J9              | 0        | 0.5783 | 113.3 | 0.00    | 1.0000  |
| NcoopUlag*numb | 3    | actor J9              | 0        | 0.5783 | 113.3 | 0.00    | 1.0000  |
| NcoopUlag*numb | 4    | actor J9              | 0        | 0.5783 | 113.3 | 0.00    | 1.0000  |
| NcoopUlag*numb | 5    | actor J9              | 0.5923   | 0.2056 | 1411  | 2.88    | 0.0040  |
| Intercept      |      | actor(actor_g) K1 K1  | 0.8833   | 0.3345 | 1358  | 2.64    | 0.0084  |
| NcoopUlag*numb | 2    | actor K1              | 0        | 0.5783 | 113.3 | 0.00    | 1.0000  |
| NcoopUlag*numb | 3    | actor K1              | 0        | 0.5783 | 113.3 | 0.00    | 1.0000  |
| NcoopUlag*numb | 4    | actor K1              | 0        | 0.5783 | 113.3 | 0.00    | 1.0000  |
| NcoopUlag*numb | 5    | actor K1              | -0.4083  | 0.1775 | 1386  | -2.30   | 0.0215  |
| Intercept      |      | actor(actor_g) K10 K2 | -0.3372  | 0.3489 | 1176  | -0.97   | 0.3341  |
| NcoopUlag*numb | 2    | actor K10             | 0        | 0.5783 | 113.3 | 0.00    | 1.0000  |
| NcoopUlag*numb | 3    | actor K10             | 0        | 0.5783 | 113.3 | 0.00    | 1.0000  |
| NcoopUlag*numb | 4    | actor K10             | 0        | 0.5783 | 113.3 | 0.00    | 1.0000  |
| NcoopUlag*numb | 5    | actor K10             | 1.0050   | 0.2675 | 1222  | 3.76    | 0.0002  |

|                  |                       |         |        |       |       |        |
|------------------|-----------------------|---------|--------|-------|-------|--------|
| Intercept        | actor(actor_g) K11 K2 | -2.0123 | 0.5810 | 556   | -3.46 | 0.0006 |
| NcoopUlag*numb 2 | actor K11             | 0       | 0.5783 | 113.3 | 0.00  | 1.0000 |
| NcoopUlag*numb 3 | actor K11             | 0       | 0.5783 | 113.3 | 0.00  | 1.0000 |
| NcoopUlag*numb 4 | actor K11             | 0       | 0.5783 | 113.3 | 0.00  | 1.0000 |
| NcoopUlag*numb 5 | actor K11             | -0.5299 | 0.4545 | 281.3 | -1.17 | 0.2447 |
| Intercept        | actor(actor_g) K12 K2 | -0.6641 | 0.3886 | 1111  | -1.71 | 0.0878 |
| NcoopUlag*numb 2 | actor K12             | 0       | 0.5783 | 113.3 | 0.00  | 1.0000 |
| NcoopUlag*numb 3 | actor K12             | 0       | 0.5783 | 113.3 | 0.00  | 1.0000 |
| NcoopUlag*numb 4 | actor K12             | 0       | 0.5783 | 113.3 | 0.00  | 1.0000 |
| NcoopUlag*numb 5 | actor K12             | -0.1123 | 0.2604 | 1240  | -0.43 | 0.6664 |
| Intercept        | actor(actor_g) K13 K1 | 0.2489  | 0.3534 | 1339  | 0.70  | 0.4814 |
| NcoopUlag*numb 2 | actor K13             | 0       | 0.5783 | 113.3 | 0.00  | 1.0000 |
| NcoopUlag*numb 3 | actor K13             | 0       | 0.5783 | 113.3 | 0.00  | 1.0000 |
| NcoopUlag*numb 4 | actor K13             | 0       | 0.5783 | 113.3 | 0.00  | 1.0000 |
| NcoopUlag*numb 5 | actor K13             | 0.2336  | 0.1817 | 1381  | 1.29  | 0.1989 |
| Intercept        | actor(actor_g) K14 K1 | -0.5751 | 0.4071 | 1174  | -1.41 | 0.1580 |
| NcoopUlag*numb 2 | actor K14             | 0       | 0.5783 | 113.3 | 0.00  | 1.0000 |
| NcoopUlag*numb 3 | actor K14             | 0       | 0.5783 | 113.3 | 0.00  | 1.0000 |
| NcoopUlag*numb 4 | actor K14             | 0       | 0.5783 | 113.3 | 0.00  | 1.0000 |
| NcoopUlag*numb 5 | actor K14             | 0.3628  | 0.1912 | 1308  | 1.90  | 0.0580 |
| Intercept        | actor(actor_g) K15 K3 | -0.7646 | 0.4888 | 799.5 | -1.56 | 0.1181 |
| NcoopUlag*numb 2 | actor K15             | 0       | 0.5783 | 113.3 | 0.00  | 1.0000 |
| NcoopUlag*numb 3 | actor K15             | 0       | 0.5783 | 113.3 | 0.00  | 1.0000 |



|                |   |                      |         |        |       |       |        |
|----------------|---|----------------------|---------|--------|-------|-------|--------|
| NcoopUlag*numb | 4 | actor K15            | 0       | 0.5783 | 113.3 | 0.00  | 1.0000 |
| NcoopUlag*numb | 5 | actor K15            | -0.7910 | 0.3680 | 556.8 | -2.15 | 0.0320 |
| Intercept      |   | actor(actor_g) K2 K3 | -0.2180 | 0.3814 | 1166  | -0.57 | 0.5678 |
| NcoopUlag*numb | 2 | actor K2             | 0       | 0.5783 | 113.3 | 0.00  | 1.0000 |
| NcoopUlag*numb | 3 | actor K2             | 0       | 0.5783 | 113.3 | 0.00  | 1.0000 |
| NcoopUlag*numb | 4 | actor K2             | 0       | 0.5783 | 113.3 | 0.00  | 1.0000 |
| NcoopUlag*numb | 5 | actor K2             | 1.0224  | 0.2591 | 1189  | 3.95  | <.0001 |
| Intercept      |   | actor(actor_g) K3 K3 | 0.05640 | 0.3633 | 1252  | 0.16  | 0.8767 |
| NcoopUlag*numb | 2 | actor K3             | 0       | 0.5783 | 113.3 | 0.00  | 1.0000 |

## The GLIMMIX Procedure

## Solution for Random Effects

| Effect         | numb | Subject              | Std Err  |        | DF    | t Value | Pr >  t |
|----------------|------|----------------------|----------|--------|-------|---------|---------|
|                |      |                      | Estimate | Pred   |       |         |         |
| NcoopUlag*numb | 3    | actor K3             | 0        | 0.5783 | 113.3 | 0.00    | 1.0000  |
| NcoopUlag*numb | 4    | actor K3             | 0        | 0.5783 | 113.3 | 0.00    | 1.0000  |
| NcoopUlag*numb | 5    | actor K3             | 0.4425   | 0.2211 | 1392  | 2.00    | 0.0456  |
| Intercept      |      | actor(actor_g) K4 K3 | -0.4689  | 0.4476 | 939.6 | -1.05   | 0.2951  |
| NcoopUlag*numb | 2    | actor K4             | 0        | 0.5783 | 113.3 | 0.00    | 1.0000  |
| NcoopUlag*numb | 3    | actor K4             | 0        | 0.5783 | 113.3 | 0.00    | 1.0000  |
| NcoopUlag*numb | 4    | actor K4             | 0        | 0.5783 | 113.3 | 0.00    | 1.0000  |
| NcoopUlag*numb | 5    | actor K4             | -0.6237  | 0.3150 | 838.7 | -1.98   | 0.0480  |
| Intercept      |      | actor(actor_g) K5 K1 | -0.4239  | 0.4050 | 1167  | -1.05   | 0.2955  |
| NcoopUlag*numb | 2    | actor K5             | 0        | 0.5783 | 113.3 | 0.00    | 1.0000  |
| NcoopUlag*numb | 3    | actor K5             | 0        | 0.5783 | 113.3 | 0.00    | 1.0000  |
| NcoopUlag*numb | 4    | actor K5             | 0        | 0.5783 | 113.3 | 0.00    | 1.0000  |
| NcoopUlag*numb | 5    | actor K5             | 0.07523  | 0.1875 | 1310  | 0.40    | 0.6884  |
| Intercept      |      | actor(actor_g) K6 K1 | -0.09923 | 0.3702 | 1305  | -0.27   | 0.7887  |

|                |   |                      |         |        |       |       |        |
|----------------|---|----------------------|---------|--------|-------|-------|--------|
| NcoopUlag*numb | 2 | actor K6             | 0       | 0.5783 | 113.3 | 0.00  | 1.0000 |
| NcoopUlag*numb | 3 | actor K6             | 0       | 0.5783 | 113.3 | 0.00  | 1.0000 |
| NcoopUlag*numb | 4 | actor K6             | 0       | 0.5783 | 113.3 | 0.00  | 1.0000 |
| NcoopUlag*numb | 5 | actor K6             | 0.3481  | 0.1865 | 1383  | 1.87  | 0.0622 |
| Intercept      |   | actor(actor_g) K7 K2 | -0.2107 | 0.3411 | 1205  | -0.62 | 0.5368 |
| NcoopUlag*numb | 2 | actor K7             | 0       | 0.5783 | 113.3 | 0.00  | 1.0000 |
| NcoopUlag*numb | 3 | actor K7             | 0       | 0.5783 | 113.3 | 0.00  | 1.0000 |
| NcoopUlag*numb | 4 | actor K7             | 0       | 0.5783 | 113.3 | 0.00  | 1.0000 |
| NcoopUlag*numb | 5 | actor K7             | 0.09078 | 0.2217 | 1441  | 0.41  | 0.6822 |
| Intercept      |   | actor(actor_g) K8 K3 | -0.1271 | 0.3809 | 1204  | -0.33 | 0.7387 |
| NcoopUlag*numb | 2 | actor K8             | 0       | 0.5783 | 113.3 | 0.00  | 1.0000 |
| NcoopUlag*numb | 3 | actor K8             | 0       | 0.5783 | 113.3 | 0.00  | 1.0000 |
| NcoopUlag*numb | 4 | actor K8             | 0       | 0.5783 | 113.3 | 0.00  | 1.0000 |
| NcoopUlag*numb | 5 | actor K8             | 0.1183  | 0.2202 | 1376  | 0.54  | 0.5910 |
| Intercept      |   | actor(actor_g) K9 K2 | -0.2614 | 0.3433 | 1203  | -0.76 | 0.4466 |
| NcoopUlag*numb | 2 | actor K9             | 0       | 0.5783 | 113.3 | 0.00  | 1.0000 |
| NcoopUlag*numb | 3 | actor K9             | 0       | 0.5783 | 113.3 | 0.00  | 1.0000 |
| NcoopUlag*numb | 4 | actor K9             | 0       | 0.5783 | 113.3 | 0.00  | 1.0000 |
| NcoopUlag*numb | 5 | actor K9             | 0.1852  | 0.2226 | 1425  | 0.83  | 0.4055 |
| Intercept      |   | actor(actor_g) L1 L2 | -0.1214 | 0.4006 | 1305  | -0.30 | 0.7619 |
| NcoopUlag*numb | 2 | actor L1             | 0       | 0.5783 | 113.3 | 0.00  | 1.0000 |
| NcoopUlag*numb | 3 | actor L1             | 0       | 0.5783 | 113.3 | 0.00  | 1.0000 |
| NcoopUlag*numb | 4 | actor L1             | 0       | 0.5783 | 113.3 | 0.00  | 1.0000 |

|                  |                       |         |        |       |       |        |
|------------------|-----------------------|---------|--------|-------|-------|--------|
| NcoopUlag*numb 5 | actor L1              | 0.4310  | 0.2021 | 1420  | 2.13  | 0.0331 |
| Intercept        | actor(actor_g) L10 L3 | 0.9768  | 0.3684 | 1452  | 2.65  | 0.0081 |
| NcoopUlag*numb 2 | actor L10             | 0       | 0.5783 | 113.3 | 0.00  | 1.0000 |
| NcoopUlag*numb 3 | actor L10             | 0       | 0.5783 | 113.3 | 0.00  | 1.0000 |
| NcoopUlag*numb 4 | actor L10             | 0       | 0.5783 | 113.3 | 0.00  | 1.0000 |
| NcoopUlag*numb 5 | actor L10             | -0.1392 | 0.1851 | 1457  | -0.75 | 0.4520 |
| Intercept        | actor(actor_g) L11 L2 | 0.1187  | 0.3888 | 1296  | 0.31  | 0.7602 |
| NcoopUlag*numb 2 | actor L11             | 0       | 0.5783 | 113.3 | 0.00  | 1.0000 |
| NcoopUlag*numb 3 | actor L11             | 0       | 0.5783 | 113.3 | 0.00  | 1.0000 |

## The GLIMMIX Procedure

## Solution for Random Effects

| Effect         | numb | Subject               | Std Err  |        |       |         |         |
|----------------|------|-----------------------|----------|--------|-------|---------|---------|
|                |      |                       | Estimate | Pred   | DF    | t Value | Pr >  t |
| NcoopUlag*numb | 4    | actor L11             | 0        | 0.5783 | 113.3 | 0.00    | 1.0000  |
| NcoopUlag*numb | 5    | actor L11             | -0.00676 | 0.1853 | 1366  | -0.04   | 0.9709  |
| Intercept      |      | actor(actor_g) L12 L3 | 0.7026   | 0.3882 | 1374  | 1.81    | 0.0705  |
| NcoopUlag*numb | 2    | actor L12             | 0        | 0.5783 | 113.3 | 0.00    | 1.0000  |
| NcoopUlag*numb | 3    | actor L12             | 0        | 0.5783 | 113.3 | 0.00    | 1.0000  |
| NcoopUlag*numb | 4    | actor L12             | 0        | 0.5783 | 113.3 | 0.00    | 1.0000  |
| NcoopUlag*numb | 5    | actor L12             | -0.3832  | 0.1955 | 1476  | -1.96   | 0.0502  |
| Intercept      |      | actor(actor_g) L13 L2 | 0.8095   | 0.3610 | 1419  | 2.24    | 0.0251  |
| NcoopUlag*numb | 2    | actor L13             | 0        | 0.5783 | 113.3 | 0.00    | 1.0000  |
| NcoopUlag*numb | 3    | actor L13             | 0        | 0.5783 | 113.3 | 0.00    | 1.0000  |
| NcoopUlag*numb | 4    | actor L13             | 0        | 0.5783 | 113.3 | 0.00    | 1.0000  |
| NcoopUlag*numb | 5    | actor L13             | 0.1001   | 0.1868 | 1444  | 0.54    | 0.5923  |
| Intercept      |      | actor(actor_g) L14 L1 | 0.6002   | 0.4141 | 1212  | 1.45    | 0.1475  |
| NcoopUlag*numb | 2    | actor L14             | 0        | 0.5783 | 113.3 | 0.00    | 1.0000  |

|                  |                       |         |        |       |       |        |
|------------------|-----------------------|---------|--------|-------|-------|--------|
| NcoopUlag*numb 3 | actor L14             | 0       | 0.5783 | 113.3 | 0.00  | 1.0000 |
| NcoopUlag*numb 4 | actor L14             | 0       | 0.5783 | 113.3 | 0.00  | 1.0000 |
| NcoopUlag*numb 5 | actor L14             | 0.07894 | 0.2177 | 1316  | 0.36  | 0.7170 |
| Intercept        | actor(actor_g) L15 L2 | -0.6222 | 0.4913 | 869.9 | -1.27 | 0.2057 |
| NcoopUlag*numb 2 | actor L15             | 0       | 0.5783 | 113.3 | 0.00  | 1.0000 |
| NcoopUlag*numb 3 | actor L15             | 0       | 0.5783 | 113.3 | 0.00  | 1.0000 |
| NcoopUlag*numb 4 | actor L15             | 0       | 0.5783 | 113.3 | 0.00  | 1.0000 |
| NcoopUlag*numb 5 | actor L15             | -0.3216 | 0.2457 | 1147  | -1.31 | 0.1908 |
| Intercept        | actor(actor_g) L2 L3  | 0.9162  | 0.3807 | 1425  | 2.41  | 0.0162 |
| NcoopUlag*numb 2 | actor L2              | 0       | 0.5783 | 113.3 | 0.00  | 1.0000 |
| NcoopUlag*numb 3 | actor L2              | 0       | 0.5783 | 113.3 | 0.00  | 1.0000 |
| NcoopUlag*numb 4 | actor L2              | 0       | 0.5783 | 113.3 | 0.00  | 1.0000 |
| NcoopUlag*numb 5 | actor L2              | 0.3868  | 0.2124 | 1525  | 1.82  | 0.0688 |
| Intercept        | actor(actor_g) L3 L1  | 0.8895  | 0.4429 | 999   | 2.01  | 0.0449 |
| NcoopUlag*numb 2 | actor L3              | 0       | 0.5783 | 113.3 | 0.00  | 1.0000 |
| NcoopUlag*numb 3 | actor L3              | 0       | 0.5783 | 113.3 | 0.00  | 1.0000 |
| NcoopUlag*numb 4 | actor L3              | 0       | 0.5783 | 113.3 | 0.00  | 1.0000 |
| NcoopUlag*numb 5 | actor L3              | 0.8370  | 0.2871 | 963.3 | 2.92  | 0.0036 |
| Intercept        | actor(actor_g) L4 L2  | 0.5255  | 0.3675 | 1381  | 1.43  | 0.1530 |
| NcoopUlag*numb 2 | actor L4              | 0       | 0.5783 | 113.3 | 0.00  | 1.0000 |
| NcoopUlag*numb 3 | actor L4              | 0       | 0.5783 | 113.3 | 0.00  | 1.0000 |
| NcoopUlag*numb 4 | actor L4              | 0       | 0.5783 | 113.3 | 0.00  | 1.0000 |
| NcoopUlag*numb 5 | actor L4              | 0.01698 | 0.1819 | 1392  | 0.09  | 0.9256 |

|                  |                      |          |        |       |       |        |
|------------------|----------------------|----------|--------|-------|-------|--------|
| Intercept        | actor(actor_g) L5 L1 | -1.5648  | 0.6857 | 329.5 | -2.28 | 0.0231 |
| NcoopUlag*numb 2 | actor L5             | 0        | 0.5783 | 113.3 | 0.00  | 1.0000 |
| NcoopUlag*numb 3 | actor L5             | 0        | 0.5783 | 113.3 | 0.00  | 1.0000 |
| NcoopUlag*numb 4 | actor L5             | 0        | 0.5783 | 113.3 | 0.00  | 1.0000 |
| NcoopUlag*numb 5 | actor L5             | -0.8335  | 0.4306 | 317.4 | -1.94 | 0.0538 |
| Intercept        | actor(actor_g) L6 L3 | 0.001880 | 0.4126 | 1261  | 0.00  | 0.9964 |
| NcoopUlag*numb 2 | actor L6             | 0        | 0.5783 | 113.3 | 0.00  | 1.0000 |
| NcoopUlag*numb 3 | actor L6             | 0        | 0.5783 | 113.3 | 0.00  | 1.0000 |
| NcoopUlag*numb 4 | actor L6             | 0        | 0.5783 | 113.3 | 0.00  | 1.0000 |

## The GLIMMIX Procedure

## Solution for Random Effects

| Effect         | numb | Subject              | Std Err  |        |       |         |         |
|----------------|------|----------------------|----------|--------|-------|---------|---------|
|                |      |                      | Estimate | Pred   | DF    | t Value | Pr >  t |
| NcoopUlag*numb | 5    | actor L6             | 0.09569  | 0.1974 | 1385  | 0.48    | 0.6280  |
| Intercept      |      | actor(actor_g) L7 L1 | 0.7492   | 0.4089 | 1236  | 1.83    | 0.0672  |
| NcoopUlag*numb | 2    | actor L7             | 0        | 0.5783 | 113.3 | 0.00    | 1.0000  |
| NcoopUlag*numb | 3    | actor L7             | 0        | 0.5783 | 113.3 | 0.00    | 1.0000  |
| NcoopUlag*numb | 4    | actor L7             | 0        | 0.5783 | 113.3 | 0.00    | 1.0000  |
| NcoopUlag*numb | 5    | actor L7             | 0.03970  | 0.2165 | 1333  | 0.18    | 0.8545  |
| Intercept      |      | actor(actor_g) L8 L1 | -1.5648  | 0.6857 | 329.5 | -2.28   | 0.0231  |
| NcoopUlag*numb | 2    | actor L8             | 0        | 0.5783 | 113.3 | 0.00    | 1.0000  |
| NcoopUlag*numb | 3    | actor L8             | 0        | 0.5783 | 113.3 | 0.00    | 1.0000  |
| NcoopUlag*numb | 4    | actor L8             | 0        | 0.5783 | 113.3 | 0.00    | 1.0000  |
| NcoopUlag*numb | 5    | actor L8             | -0.8335  | 0.4306 | 317.4 | -1.94   | 0.0538  |
| Intercept      |      | actor(actor_g) L9 L3 | -2.0385  | 0.6164 | 466.7 | -3.31   | 0.0010  |
| NcoopUlag*numb | 2    | actor L9             | 0        | 0.5783 | 113.3 | 0.00    | 1.0000  |
| NcoopUlag*numb | 3    | actor L9             | 0        | 0.5783 | 113.3 | 0.00    | 1.0000  |



|                  |          |        |        |       |      |        |
|------------------|----------|--------|--------|-------|------|--------|
| NcoopUlag*numb 4 | actor L9 | 0      | 0.5783 | 113.3 | 0.00 | 1.0000 |
| NcoopUlag*numb 5 | actor L9 | 0.2838 | 0.2676 | 698   | 1.06 | 0.2892 |

### Contrasts

|         | Num | Den   |         |        |
|---------|-----|-------|---------|--------|
| Label   | DF  | DF    | F Value | Pr > F |
| 2-3     | 1   | 192.7 | 0.75    | 0.3891 |
| 2-4     | 1   | 200.1 | 2.41    | 0.1223 |
| 2-5     | 1   | 200.7 | 0.30    | 0.5835 |
| 3-4     | 1   | 176.2 | 0.32    | 0.5726 |
| 3-5     | 1   | 178.7 | 0.14    | 0.7072 |
| 4-5     | 1   | 181.9 | 1.12    | 0.2919 |
| 2-3 lag | 1   | 224.1 | 62.85   | <.0001 |
| 2-4 lag | 1   | 226.5 | 103.09  | <.0001 |
| 2-5 lag | 1   | 214.6 | 118.15  | <.0001 |
| 3-4 lag | 1   | 185.8 | 1.14    | 0.2878 |
| 3-5 lag | 1   | 178.5 | 4.45    | 0.0364 |
| 4-5 lag | 1   | 163.3 | 1.66    | 0.2000 |

Tests of Covariance Parameters

Based on the Residual Pseudo-Likelihood

-----Estimates H0-----

| Label | DF | -2 Res | Log P-Like | ChiSq  | Pr > ChiSq | Est1  | Est2    | Est3  | Est4 | Note |
|-------|----|--------|------------|--------|------------|-------|---------|-------|------|------|
| nlag  | 1  | 111223 | 424.93     | <.0001 | 0.000      | 0.395 | -0.0288 | 0.938 |      | MI   |
| nlag  | 1  | 111225 | 426.85     | <.0001 | 0.873      | 0.000 | -0.0414 | 0.940 |      | MI   |
| nlag  | 1  | 110802 | 3.85       | 0.0497 | 0.894      | 0.345 | 0.0000  | 0.906 |      | DF   |
